# Supplementary material for: Diagnostic accuracy of presepsin in predicting bacteraemia in elderly patients admitted to the emergency department: prospective study in Japan
Source: PubMed Central journal article supplement — BMJ Open. 2019 Dec 15;9(12):e030421. doi: 10.1136/bmjopen-2019-030421 (PMC6924853; doi:10.1136/bmjopen-2019-030421), 2019-12-15

# BMJ Open

BMJ Open is committed to open peer review. As part of this commitment we make the peer review history of every article we publish publicly available.

When an article is published we post the peer reviewers' comments and the authors' responses online. We also post the versions of the paper that were used during peer review. These are the versions that the peer review comments apply to.

The versions of the paper that follow are the versions that were submitted during the peer review process. They are not the versions of record or the final published versions. They should not be cited or distributed as the published version of this manuscript.

BMJ Open is an open access journal and the full, final, typeset and author-corrected version of record of the manuscript is available on our site with no access controls, subscription charges or pay-per-view fees (<http://bmjopen.bmj.com>).

If you have any questions on BMJ Open's open peer review process please email [editorial.bmjopen@bmj.com](mailto:editorial.bmjopen@bmj.com)

# BMJ Open

## Diagnostic accuracy of presepsin in predicting bacteremia in elderly patients admitted to the emergency department

|                               |                                                                                                                                                                                                                                                                                                                                                                                                                                                                |
|-------------------------------|----------------------------------------------------------------------------------------------------------------------------------------------------------------------------------------------------------------------------------------------------------------------------------------------------------------------------------------------------------------------------------------------------------------------------------------------------------------|
| Journal:                      | <i>BMJ Open</i>                                                                                                                                                                                                                                                                                                                                                                                                                                                |
| Manuscript ID                 | bmjopen-2019-030421                                                                                                                                                                                                                                                                                                                                                                                                                                            |
| Article Type:                 | Research                                                                                                                                                                                                                                                                                                                                                                                                                                                       |
| Date Submitted by the Author: | 21-Mar-2019                                                                                                                                                                                                                                                                                                                                                                                                                                                    |
| Complete List of Authors:     | Yoshiro, Imai; Osaka Medical College, general and gastroenterological surgery<br>Kohei, Taniguchi; Osaka Medical College, general and gastroenterological surgery<br>Ryo, Iida; Osaka Medical College, general and gastroenterological surgery<br>Masahiko, Nitta; Osaka Medical College, Emergency Medicine<br>Kazuhisa, Uchiyama; Osaka Medical College, general and gastroenterological surgery<br>Akira, Takasu; Osaka Medical College, Emergency Medicine |
| Keywords:                     | presepsin, elderly patients, bacteremia, emergency department, biomarker                                                                                                                                                                                                                                                                                                                                                                                       |
|                               |                                                                                                                                                                                                                                                                                                                                                                                                                                                                |

SCHOLARONE™  
Manuscripts

**Title Page****Diagnostic accuracy of presepsin in predicting bacteremia in elderly patients  
admitted to the emergency department**

Yoshiro Imai<sup>1)2)</sup> MD, PhD, Kohei Taniguchi<sup>1)2)</sup> MD, PhD, Ryo Iida<sup>1)2)</sup> MD,  
Masahiko Nitta<sup>1)</sup> MD, PhD, Kazuhisa Uchiyama<sup>2)</sup> MD, PhD, Akira Takasu<sup>1)</sup> MD, PhD

1): Departments of Emergency Medicine, Osaka Medical College

2): Departments of General and Gastroenterological Surgery, Osaka Medical College

**Running title:**

presepsin in predicting bacteremia in elderly patients

**Corresponding author**

Yoshiro Imai, MD, PhD (corresponding author)

Departments of Emergency Medicine

Osaka Medical College

2-7 Daigakumachi, Takatsuki 569-8686(Japan)

E-mail [sur141@osaka-med.ac.jp](mailto:sur141@osaka-med.ac.jp)

Tel. +81-72-683-1221

Fax. +81-72-684-6262

**Keywords:** presepsin, elderly patients, bacteremia, emergency department, biomarker

## Abstract

### Objective

Early detection of bacteremia in the elderly is needed in the emergency department (ED). We aimed to compare the accuracy of detecting bacteremia between the new biomarker presepsin and the widely used procalcitonin (PCT) and C-reactive protein (CRP) in clinical situations.

### Methods

This prospective study was conducted in the ED of a teaching hospital between September 2014 and March 2016. Forty-six elderly patients aged  $\geq 70$  years and who fulfilled the systemic inflammatory response syndrome criteria were included in this study. Blood sampling to evaluate CRP, PCT, presepsin plasma levels; two sets of blood sampling for bacterial cultures; and evaluations of the Sequential Organ Failure Assessment (SOFA) and Acute Physiology and Chronic Health Evaluation (APACHE II) scores were performed upon arrival at the ED. The results were compared between patients with bacteremia and those without bacteremia.

### Results

The presepsin value was significantly higher in the bacteremia group than in the non-bacteremia group ( $866.6 \pm 184.6$  pg/mL vs.  $639.9 \pm 137.1$  pg/mL,  $p = 0.03$ ). The PCT and CRP did not significantly differ between the groups. The area under the receiver-operating-characteristic curve (AUC) values were not significantly different among presepsin (0.69), PCT (0.61), and CRP (0.53). Multivariate analysis showed that presepsin was independently associated with bacteremia (odds ratio, 8.84; 95% confidence interval, 1.32–177.09;  $p = 0.02$ ).

### Conclusion

1  
2  
3  
4  
5 Similar to CRP and PCT, presepsin was a useful biomarker to detect bacteremia in  
6 elderly patients admitted to the ED.  
7  
8  
9

### 10 11 12 ***Strengths and limitations of this study*** 13

- 14  
15 • This work should be of interest to a broad readership, Early detection of bacteremia in the  
16 elderly is needed in the emergency department (ED).  
17
- 18  
19 • The work presented herein is original, has not been previously published in whole or in part  
20
- 21  
22 • The present study include the relatively small sample size, the single-center design,  
23  
24 and the relatively high exclusion ratio of the eligible patients.  
25
- 26  
27 • Our findings may have been underpowered and represent type 2 statistical error.  
28  
29  
30  
31  
32  
33  
34  
35  
36

### 37 **Introduction**

38  
39 Bacteremia is a severe bacterial bloodstream infection that is associated with a  
40 significant mortality<sup>1 2</sup>. In particular, the susceptibility to bacteremia is increased in  
41 elderly people who have decreased immunity due various underlying diseases, such as  
42 diabetes and malignant disorders. In recent years, the number of elderly people who are  
43 brought to the emergency department (ED) has increased in an aging society. Therefore,  
44 early diagnosis of bacteremia upon arrival at the ED is important.  
45  
46  
47  
48  
49  
50  
51  
52

53  
54 Blood bacterial culture is the gold standard to diagnose bacteremia, but it  
55 requires several days to obtain the results<sup>3</sup>. Various biomarkers, including C-reactive  
56 protein (CRP) and procalcitonin (PCT), had been used to support the diagnosis of  
57  
58  
59  
60

1  
2  
3  
4  
5 bacteremia. Presepsin, which is the soluble fraction of cluster-of-differentiation 14  
6 (CD14), had been thought to be associated with infections<sup>4</sup>, based on the fact that a  
7  
8 subtype of CD14 is present inside and on the cell membranes of macrophages,  
9  
10 monocytes, and granulocytes and is responsible for intracellular transduction of  
11  
12 endotoxin signals. Several studies demonstrated that presepsin was more useful than  
13  
14 PCT for the diagnosis of sepsis<sup>5 6</sup>. In a systematic review and meta-analysis, presepsin  
15  
16 levels were significantly lower in sepsis survivors than in non-survivors<sup>7</sup>; however,  
17  
18 most of these presepsin levels were taken at the intensive care unit, not at the ED.  
19  
20  
21  
22  
23

24 The aim of the present study was to evaluate the accuracy of presepsin, in  
25  
26 comparison with PCT and CRP, in predicting bacteremia in elderly patients admitted to  
27  
28 the ED for suspected infection with systemic inflammatory response syndrome (SIRS).  
29

## 30 **Materials and methods**

### 31 *Patients and study design*

32  
33 This study was prospectively conducted at the ED of Osaka Medical College Hospital  
34  
35 between September 2014 and March 2016. Elderly patients aged  $\geq 70$  years and who  
36  
37 fulfilled the SIRS criteria or were suspected to have bacteremia were eligible to enroll in  
38  
39 this study. The exclusion criteria were terminal stage of malignant cancer, acquired  
40  
41 immunodeficiency syndrome or end-stage liver disease, and absence of patient or  
42  
43 relative consent to enroll in the study.  
44  
45  
46  
47  
48

49 Upon arrival to the ED, all eligible patients underwent two sets of collection of  
50  
51 20 mL of blood samples for bacterial cultures and one collection of 10 mL of blood for  
52  
53 measurements of CRP, PCT, and presepsin levels in plasma. SOFA<sup>8</sup> and APACHE II<sup>9</sup>  
54  
55 scores were also evaluated. The plasma levels of the 3 biomarkers and the morbidity  
56  
57 scores were compared between 2 groups of patients: the bacteremia group (i.e., positive  
58  
59  
60

1  
2  
3  
4  
5 result on bacterial blood cultures) and the non-bacteremia group (i.e., negative result on  
6 bacterial blood cultures). The study protocol was approved by the ethics committee of  
7  
8  
9  
10 Osaka Medical College (1585). Written informed consent was obtained from each  
11  
12  
13 subject.

### 14 ***Measurement methods***

15  
16  
17 The CRP, PCT, and presepsin levels were measured in the blood specimens collected at  
18  
19 the ED before antimicrobial agent administration. Blood samples were collected in  
20  
21 tubes that contained ethylenediaminetetraacetic acid, with slow mixing followed by  
22  
23 immediate centrifugation at 3,000 rpm for 10 minutes. The separated plasma was  
24  
25 collected and stored at  $-35^{\circ}\text{C}$  until analysis. Plasma presepsin levels were determined  
26  
27 by a chemiluminescent enzyme immunoassay (PATHFAST immunoassay analytical  
28  
29 system; PROGEN Biotechnik GmbH, Heidelberg, Germany; Mitsubishi Chemical  
30  
31 Medience Corporation, Japan), according to the manufacturer's recommendations. After  
32  
33 sterilization of the sites (either percutaneous or from a vascular access device) with the  
34  
35 use of a chlorhexidine–alcohol mixture<sup>10</sup>, 2 sets of 10-mL blood were obtained (1 each  
36  
37 for the aerobic and anaerobic bottles) and submitted to our central laboratory for culture.  
38  
39  
40

### 41 ***Statistical analysis***

42  
43  
44 Statistical analysis was performed using the JMP, version 13.0 (SAS Institute Inc.,  
45  
46 Cary, NC, USA). Continuous variables were presented as mean  $\pm$  standard deviation  
47  
48 (SD) and were compared using the Wilcoxon rank sum test. Chi-square test was used to  
49  
50 compare differences in the categorical variables. A multivariate logistic regression  
51  
52 analysis model was used to identify the influence of CRP, PCT, and presepsin on  
53  
54 bacteremia. The receiver operating characteristic curve (ROC) was used to derive the  
55  
56 optimal cutoff values, with sensitivity, specificity, predictive values, and likelihood  
57  
58  
59  
60

1  
2  
3  
4  
5 ratios, of the biomarkers in predicting bacteremia; the corresponding area under the  
6  
7 (AUC) values were calculated. Correlations between the biomarkers and the SOFA and  
8  
9 APACHE II scores were analyzed using Spearman's rank correlation test. A p value of  
10  
11 less than 0.05 was considered statistically significant.  
12  
13

### 14 ***Patient and Public Involvement***

15  
16  
17 The development of the research question and outcome measures was informed by the  
18  
19 elderly patients who have decreased immunity due various underlying diseases admitted  
20  
21 to the ED. During the study design period, elderly patients aged  $\geq 70$  years and who  
22  
23 fulfilled the SIRS criteria or were suspected to have bacteremia were invited to  
24  
25 participate in this study. Written informed consent was obtained from each subject.  
26  
27

28 The results of our study will be disseminated to patient who wish to be notified.  
29

### 30 **Results**

#### 31 ***Characteristics of the study population and microbiology results***

32  
33 Of 56 patients who were eligible for this study, 4 patients with terminal stage of  
34  
35 malignant cancer, 4 patients with acquired immune deficiency syndrome, 1 patient with  
36  
37 end-stage liver disease, and 1 patient who did not consent to enroll in this study were  
38  
39 excluded. Therefore, 46 patients (28 men and 18 women) were included in this study.  
40  
41 The mean age was  $78 \pm 6.7$  years. Blood cultures were positive in 16 cases (35%) and  
42  
43 negative in 30 cases (65%). Thee isolated bacteria were Gram-positive microorganisms  
44  
45 in 11 cases (*Staphylococcus caprae* in 1, *Staphylococcus epidermidis* in 5,  
46  
47 *Staphylococcus hominis* in 1, *Lactobacillus acidophilus* in 1, *Enterococcus species* in 1,  
48  
49 *Streptococcus species* in 1, and *Streptococcus equisimilis* in 1) and Gram-negative  
50  
51 microorganisms in 5 cases (*Serratia marcescens* in 1, *Morganella morganii* in 1,  
52  
53 *Klebsiella pneumoniae* in 1, and *Escherichia coli* in 1).  
54  
55  
56  
57  
58  
59  
60



### ***Comparison between the bacteremia and non-bacteremia groups***

The univariate analysis showed no significant differences between the 2 groups in terms of sex ( $p = 0.57$ ) and age ( $p = 0.86$ ) (Table 1). The presepsin value was significantly higher in the bacteremia group than in the non-bacteremia group ( $866.6 \pm 184.6$  pg/mL vs.  $639.9 \pm 137.1$  pg/mL,  $p = 0.03$ ). Both groups had similar PCT ( $p = 0.18$ ), CRP ( $p = 0.66$ ), SOFA ( $p = 0.07$ ), and APACHE II ( $p = 0.53$ ). The cutoff values derived from the ROC curves were 285 pg/mL for presepsin, 15.8 ng/mL for PCT, and 34.6 mg/mL for CRP (Table 2). The AUC value of presepsin (0.69) did not significantly differ with that of PCT (0.61,  $p = 0.30$ ) and CRP (0.53,  $p = 0.07$ ) (Figure 1).

In the multivariate analysis, only presepsin was the independent risk factor for bacteremia (hazard ratio, 8.84; 95% confidence interval, 0.95–81.8;  $p = 0.02$ ) (Table 3). As shown in Figure 2, presepsin, PCT, and CRP significantly correlated with the SOFA ( $p < 0.0001$ ,  $p < 0.0001$ , and  $p < 0.0006$ , respectively) and the APACHE II ( $p < 0.0001$ ,  $p = 0.0005$ , and  $p = 0.04$ , respectively) scores. The Spearman's rank correlation values with the SOFA and APACHE II scores were higher for presepsin (0.56 and 0.59, respectively) than for PCT (0.53 and 0.49, respectively) and CRP (0.39 and 0.3, respectively).

### **Discussion**

Early diagnosis of bacteremia at the ED is very important for the initiation of appropriate treatments and to improve outcomes, but it is not easy and often overlooked, especially in elderly patients, in whom symptoms are not always straightforward and can be misleading. In this prospective study on elderly patients admitted at the ED, we found that 1) presepsin levels were higher with bacteremia than with non-bacteremia; 2) presepsin was an independent predictor of bacteremia; and 3) there was no significant

1  
2  
3  
4  
5 difference in the AUC values among presepsin, PCT, and CRP. Therefore, presepsin  
6 was demonstrated as effective as CRP and PCT in diagnosing bacteremia in elderly  
7 patients admitted to the ED.  
8  
9

10  
11  
12 Liu et al<sup>5</sup> and Carpio et al<sup>11</sup> reported that the cutoff values of presepsin for  
13 mortality in septic ED patients were 556 and 825 pg/mL, respectively. Considering that  
14 the outcome of those studies was mortality, a cutoff value of 285 pg/mL for bacteremia  
15 in our study might be reasonable. Romualdo et al reported that the cutoff value for  
16 bacteremic SIRS was 729 pg/mL for ED patients with a mean age of 67 years<sup>12</sup>. In our  
17 study, the sensitivity was 93.7% and the negative predictive value was 92.3%. In elderly  
18 patients who are more prone to infections, the cutoff value for bacteremia might be  
19 lower, compared with that in young people.  
20  
21  
22  
23  
24  
25  
26  
27  
28  
29

30  
31 There were no significant differences in the SOFA and APACHE II scores  
32 between the groups. Notably, such physiologic estimations might have been offset by  
33 the elderly pathophysiologic characteristics, including dementia, which could have  
34 complicated consciousness assessment; potential hypertension, which could have  
35 rendered the blood pressure as normal; and the intake of various oral medications for  
36 other diseases. Nevertheless, the stronger correlations with the SOFA or APACHE II  
37 scores of presepsin than of PCT and CRP suggested that compared with PCT and CRP,  
38 presepsin more likely reflected the disease severity of elderly patients upon arrival at the  
39 ED.  
40  
41  
42  
43  
44  
45  
46  
47  
48  
49  
50

51  
52 In this study, blood culture contaminations were likely. The median adult  
53 inpatient blood culture contamination rate was reported to be only 2.5%<sup>13</sup> and 12.4%  
54 rate of isolated coagulase-negative staphylococci (CNS) was reported to be clinically  
55 significant<sup>14</sup>. Therefore, the presence of CNS in 7 of 16 (43%) positive blood cultures  
56  
57  
58  
59  
60

1  
2  
3  
4  
5 might have significantly affected the results of this study. However, our study  
6  
7  
8 population comprised elderly people who were susceptible to bacteremia due to  
9  
10 decreased immunity; therefore, the probability of isolating the true pathogens on culture  
11  
12 is higher than that in adults. The other limitations of the present study include the  
13  
14 relatively small sample size, the single-center design, and the relatively high exclusion  
15  
16 ratio of 18% (10 of 56) of the eligible patients. Therefore, our findings may have been  
17  
18 underpowered and represent type 2 statistical error.  
19  
20

## 21 **Conclusion**

22  
23 This cohort study suggested that similar to CRP and PCT, presepsin may be useful in  
24  
25 detecting bacteremia in elderly patients admitted to the ED. Further study is needed to  
26  
27 define the exact cutoff value for the prediction of bacteremia in these patients.  
28  
29  
30  
31  
32

## 33 **Figure 1. Receiver-operating characteristic curve**

34  
35 Diagnostic value of presepsin, PCT, and CRP for differentiating between positive and  
36  
37 negative blood cultures  
38  
39  
40  
41

## 42 **Figure 2. Correlations of the 3 biomarkers with the SOFA and APACHE II scores**

43  
44 a-1. Presepsin and SOFA score:  $R = 0.56$   $p < 0.001$

45  
46 a-2. PCT and SOFA score:  $R = 0.53$   $p < 0.001$

47  
48 a-3. CRP and SOFA score:  $R = 0.39$   $p = 0.006$

49  
50 b-1. Presepsin and APACHE II score:  $R = 0.59$   $p < 0.001$

51  
52 b-2. PCT and APACHE II score:  $R = 0.49$   $p < 0.001$

53  
54 b-3. CRP and APACHE II score:  $R = 0.30$   $p = 0.04$   
55  
56  
57  
58  
59  
60

**Table 1. Characteristics of the study population**

|                     | Non-bacteremia<br>(n = 30) | Bacteremia<br>(n = 46) | P-Value |
|---------------------|----------------------------|------------------------|---------|
| Age, years          | 77.30±1.23                 | 78.93±1.69             | 0.57    |
| Sex, n. male/female | 18/12                      | 10/6                   | 0.86    |
| Presepsin (pg/mL)   | 639.93±137.10              | 866.56±184.58          | 0.03    |
| PCT (ng/mL)         | 6.77±10.05                 | 45.04±13.76            | 0.18    |
| CRP (mg/L)          | 12.64±2.38                 | 15.41±3.26             | 0.66    |
| SOFA score          | 2.20±0.47                  | 4.2±0.65               | 0.07    |
| APACHE II score     | 13.63±1.0                  | 14.56±1.37             | 0.53    |

PCT: procalcitonin

CRP: C-reactive protein

SOFA: Sequential Organ Failure Assessment

APACH II : Acute Physiology and Chronic Health Evaluation

**Table 2. Prediction of bacteremia**

|                   | Cutoff | Sensitivity, % | Specificity, % | PPV, % | NPV, % |
|-------------------|--------|----------------|----------------|--------|--------|
| Presepsin (pg/mL) | 285    | 93.7           | 41.3           | 46.8   | 92.3   |
| PCT (ng/mL)       | 15.8   | 43.7           | 86.7           | 63.6   | 74.2   |
| CRP (mg/L)        | 34.6   | 25             | 93.3           | 66.6   | 70     |

PPV: positive predictive value, NPV: negative predictive value

**Table 3. Multivariate analysis of the risk factors for bacteremia**

|                   | Hazard ratio | 95%CI      | P-Value |
|-------------------|--------------|------------|---------|
| Presepsin (pg/mL) | 8.84         | 0.95-81.79 | 0.02    |
| PCT (ng/mL)       | 2.89         | 0.19-0.56  | 0.18    |
| CRP (mg/L)        | 0.65         | 0.06-6.54  | 0.71    |

CI: confidence interval

### Abbreviations

ED; emergency department, PCT; procalcitonin, CRP; C-reactive protein

SOFA; Sequential Organ Failure Assessment, APACH II; Acute Physiology and

Chronic Health Evaluation, AUC; area under the receiver-operating-characteristic curve

ROC; receiver operating characteristic curve, CD14; cluster-of-differentiation 14

SIRS; systemic inflammatory response syndrome, CNS; coagulase-negative

staphylococci

### Authors' Contributions

Conception and design of the study: Y. Imai, A. Takasu. Acquisition of data: Y. Imai, R.

Iida, M. Nitta, A. Takasu. Analysis and interpretation of the data: Y. Imai, A. Takasu.

Material and financial support: Y. Imai, K. Taniguchi, R. Iida, M. Nitta, K. Uchiyama

and A. Takasu. Writing, review, and/or revision of the manuscript: Y. Imai, A. Takasu.

### Acknowledgement:

We are grateful for the cooperation of the staff involved in emergency department.

## Funding Statement

This research received no specific grant from any funding agency in the public, commercial, or not-for-profit sectors.

## Conflict of Interest:

No

## Data availability statement

No additional data available

## References

1. Martin GS, Mannino DM, Eaton S, et al. The epidemiology of sepsis in the United States from 1979 through 2000. *N Engl J Med* 2003;348(16):1546-54. doi: 10.1056/NEJMoa022139 [published Online First: 2003/04/18]
2. Thwaites GE, Scarborough M, Szubert A, et al. Adjunctive rifampicin to reduce early mortality from *Staphylococcus aureus* bacteraemia: the ARREST RCT. *Health Technol Assess* 2018;22(59):1-148. doi: 10.3310/hta22590 [published Online First: 2018/11/02]
3. Flayhart D, Borek AP, Wakefield T, et al. Comparison of BACTEC PLUS blood culture media to BacT/Alert FA blood culture media for detection of bacterial pathogens in samples containing therapeutic levels of antibiotics. *J Clin Microbiol* 2007;45(3):816-21. doi: 10.1128/JCM.02064-06 [published Online First: 2006/12/15]

- 1  
2  
3  
4  
5  
6  
7  
8  
9  
10  
11  
12  
13  
14  
15  
16  
17  
18  
19  
20  
21  
22  
23  
24  
25  
26  
27  
28  
29  
30  
31  
32  
33  
34  
35  
36  
37  
38  
39  
40  
41  
42  
43  
44  
45  
46  
47  
48  
49  
50  
51  
52  
53  
54  
55  
56  
57  
58  
59  
60
4. Shozushima T, Takahashi G, Matsumoto N, et al. Usefulness of presepsin (sCD14-ST) measurements as a marker for the diagnosis and severity of sepsis that satisfied diagnostic criteria of systemic inflammatory response syndrome. *J Infect Chemother* 2011;17(6):764-9. doi: 10.1007/s10156-011-0254-x [published Online First: 2011/05/12]
  5. Liu B, Chen YX, Yin Q, et al. Diagnostic value and prognostic evaluation of Presepsin for sepsis in an emergency department. *Crit Care* 2013;17(5):R244. doi: 10.1186/cc13070 [published Online First: 2013/10/22]
  6. Ulla M, Pizzolato E, Lucchiari M, et al. Diagnostic and prognostic value of presepsin in the management of sepsis in the emergency department: a multicenter prospective study. *Crit Care* 2013;17(4):R168. doi: 10.1186/cc12847 [published Online First: 2013/08/01]
  7. Yang HS, Hur M, Yi A, et al. Prognostic value of presepsin in adult patients with sepsis: Systematic review and meta-analysis. *PLoS One* 2018;13(1):e0191486. doi: 10.1371/journal.pone.0191486 [published Online First: 2018/01/25]
  8. Vincent JL, Moreno R, Takala J, et al. The SOFA (Sepsis-related Organ Failure Assessment) score to describe organ dysfunction/failure. On behalf of the

- 1  
2  
3  
4  
5  
6 Working Group on Sepsis-Related Problems of the European Society of  
7  
8  
9 Intensive Care Medicine. *Intensive Care Med* 1996;22(7):707-10. [published  
10  
11  
12 Online First: 1996/07/01]  
13  
14
- 15 9. Knaus WA, Draper EA, Wagner DP, et al. APACHE II: a severity of disease  
16  
17  
18 classification system. *Crit Care Med* 1985;13(10):818-29. [published Online  
19  
20  
21 First: 1985/10/01]  
22  
23
- 24 10. Maiwald M, Chan ES. The forgotten role of alcohol: a systematic review and meta-  
25  
26  
27 analysis of the clinical efficacy and perceived role of chlorhexidine in skin  
28  
29  
30 antisepsis. *PLoS One* 2012;7(9):e44277. doi: 10.1371/journal.pone.0044277  
31  
32  
33 [published Online First: 2012/09/18]  
34  
35
- 36 11. Carpio R, Zapata J, Spanuth E, et al. Utility of presepsin (sCD14-ST) as a  
37  
38  
39 diagnostic and prognostic marker of sepsis in the emergency department. *Clin*  
40  
41  
42 *Chim Acta* 2015;450:169-75. doi: 10.1016/j.cca.2015.08.013 [published  
43  
44  
45 Online First: 2015/08/25]  
46  
47
- 48 12. Romualdo LG, Torrella PE, Gonzalez MV, et al. Diagnostic accuracy of presepsin  
49  
50  
51 (soluble CD14 subtype) for prediction of bacteremia in patients with systemic  
52  
53  
54 inflammatory response syndrome in the Emergency Department. *Clin Biochem*  
55  
56  
57 2014;47(7-8):505-8. doi: 10.1016/j.clinbiochem.2014.02.011 [published  
58  
59  
60



1  
2  
3  
4  
5  
6 Online First: 2014/02/25]  
7  
8

- 9 13. Schifman RB, Bachner P, Howanitz PJ. Blood culture quality improvement: a  
10  
11 College of American Pathologists Q-Probes study involving 909 institutions and  
12  
13 289 572 blood culture sets. *Arch Pathol Lab Med* 1996;120(11):999-1002.  
14  
15  
16  
17  
18 [published Online First: 1996/11/01]  
19

- 20  
21 14. Weinstein MP, Towns ML, Quartey SM, et al. The clinical significance of positive  
22  
23 blood cultures in the 1990s: a prospective comprehensive evaluation of the  
24  
25 microbiology, epidemiology, and outcome of bacteremia and fungemia in  
26  
27  
28 adults. *Clin Infect Dis* 1997;24(4):584-602. [published Online First:  
29  
30  
31  
32  
33 1997/04/01]  
34  
35  
36  
37  
38  
39  
40  
41  
42  
43  
44  
45  
46  
47  
48  
49  
50  
51  
52  
53  
54  
55  
56  
57  
58  
59  
60

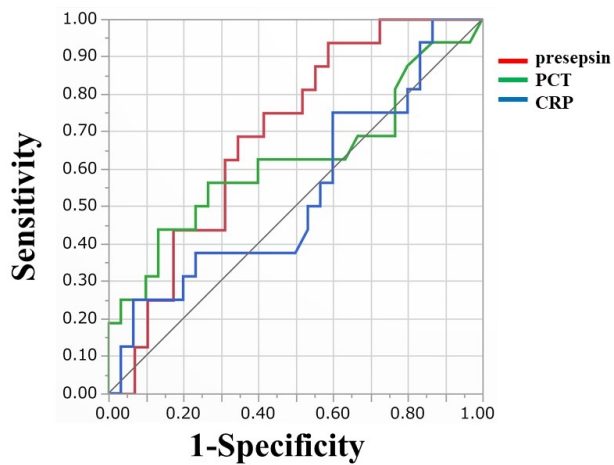

Receiver-operating characteristic curve

338x190mm (96 x 96 DPI)

1  
2  
3  
4  
5  
6  
7  
8  
9  
10  
11  
12  
13  
14  
15  
16  
17  
18  
19  
20  
21  
22  
23  
24  
25  
26  
27  
28  
29  
30  
31  
32  
33  
34  
35  
36  
37  
38  
39  
40  
41  
42  
43  
44  
45  
46  
47  
48  
49  
50  
51  
52  
53  
54  
55  
56  
57  
58  
59  
60

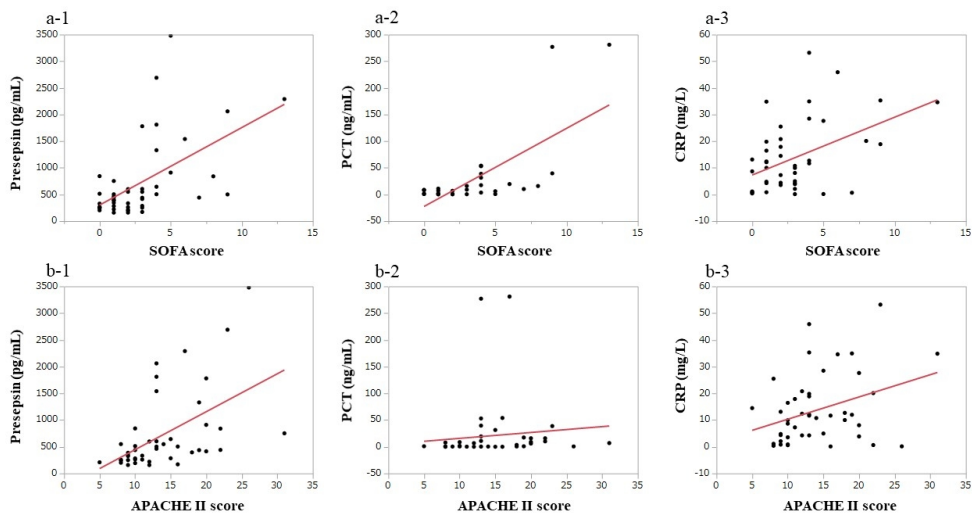

Correlations of the 3 biomarkers with the SOFA and APACHE II scores  
338x190mm (96 x 96 DPI)

# BMJ Open

**Diagnostic accuracy of presepsin in predicting bacteremia in elderly patients admitted to the emergency department : prospective study comparing the accuracy of detecting bacteremia between the presepsin, PCT and CRP.**

|                                 |                                                                                                                                                                                                                                                                                                                                                                                                                                                                |
|---------------------------------|----------------------------------------------------------------------------------------------------------------------------------------------------------------------------------------------------------------------------------------------------------------------------------------------------------------------------------------------------------------------------------------------------------------------------------------------------------------|
| Journal:                        | <i>BMJ Open</i>                                                                                                                                                                                                                                                                                                                                                                                                                                                |
| Manuscript ID                   | bmjopen-2019-030421.R1                                                                                                                                                                                                                                                                                                                                                                                                                                         |
| Article Type:                   | Original research                                                                                                                                                                                                                                                                                                                                                                                                                                              |
| Date Submitted by the Author:   | 08-Jul-2019                                                                                                                                                                                                                                                                                                                                                                                                                                                    |
| Complete List of Authors:       | Yoshiro, Imai; Osaka Medical College, general and gastroenterological surgery<br>Taniguchi, Kohei; Osaka Medical College, general and gastroenterological surgery<br>Ryo, Iida; Osaka Medical College, general and gastroenterological surgery<br>Masahiko, Nitta; Osaka Medical College, Emergency Medicine<br>Kazuhisa, Uchiyama; Osaka Medical College, general and gastroenterological surgery<br>Akira, Takasu; Osaka Medical College, Emergency Medicine |
| <b>Primary Subject Heading</b>: | Emergency medicine                                                                                                                                                                                                                                                                                                                                                                                                                                             |
| Secondary Subject Heading:      | Diagnostics                                                                                                                                                                                                                                                                                                                                                                                                                                                    |
| Keywords:                       | presepsin, elderly patients, bacteremia, emergency department, biomarker                                                                                                                                                                                                                                                                                                                                                                                       |
|                                 |                                                                                                                                                                                                                                                                                                                                                                                                                                                                |

SCHOLARONE™  
Manuscripts

**Title Page**

**Diagnostic accuracy of presepsin in predicting bacteremia in elderly patients admitted to the emergency department : prospective study comparing the accuracy of detecting bacteremia between the presepsin, PCT and CRP.**

Yoshiro Imai<sup>1)2)</sup> MD, PhD, Kohei Taniguchi<sup>1)2)</sup> MD, PhD, Ryo Iida<sup>1)2)</sup> MD,

Masahiko Nitta<sup>1)</sup> MD, PhD, Kazuhisa Uchiyama<sup>2)</sup> MD, PhD, Akira Takasu<sup>1)</sup> MD, PhD

1): Departments of Emergency Medicine, Osaka Medical College

2): Departments of General and Gastroenterological Surgery, Osaka Medical College

**Running title:**

presepsin in predicting bacteremia in elderly patients

**Corresponding author**

Yoshiro Imai, MD, PhD (corresponding author)

Departments of Emergency Medicine

Osaka Medical College

2-7 Daigakumachi, Takatsuki 569-8686(Japan)

E-mail [sur141@osaka-med.ac.jp](mailto:sur141@osaka-med.ac.jp)

Tel. [+81-72-683-1221](tel:+81-72-683-1221)

Fax. [+81-72-684-6262](tel:+81-72-684-6262)

**Keywords:** presepsin, elderly patients, bacteremia, emergency department, biomarker

## Abstract

### Objective

Early detection of bacteremia in the elderly is needed in the emergency department (ED).

### Design, Setting, and Participants

Prospective, singlecenter trial in patients with fulfilled the sepsis was conducted between September 2014 and March 2016. Forty-six elderly patients aged  $\geq 70$  years were included.

### Interventions

Blood sampling to evaluate CRP, PCT, presepsin plasma levels; two sets of blood sampling for bacterial cultures; and evaluations of the Sequential Organ Failure Assessment (SOFA) and Acute Physiology and Chronic Health Evaluation (APACHE II) scores were performed upon arrival at the ED. The results were compared between patients with bacteremia and those without bacteremia.

### Main Outcome Measure

The accuracy of detecting bacteremia

### Results

The presepsin value was significantly higher in the bacteremia group than in the non-bacteremia group ( $866.6 \pm 184.6$  pg/mL vs.  $639.9 \pm 137.1$  pg/mL,  $p = 0.03$ ). The PCT and CRP did not significantly differ between the groups. The area under the receiver-operating-characteristic curve (AUC) values were not significantly different among presepsin (0.69), PCT (0.61), and CRP (0.53). Multivariate analysis showed that presepsin was independently associated with bacteremia (odds ratio, 8.84; 95% confidence interval, 0.95–81.79;  $p = 0.02$ ).

## Conclusion

Presepsin could be a better biomarker to evaluate bacteremia in elderly patients with sepsis criteria admitted to the ED.

## Funding

This research received no specific grant from any funding agency in the public, commercial, or not-for-profit sectors.

## *Strengths and limitations of this study*

- Research limited to the elderly is original.
- The present study include the relatively small sample size, the single-center design, and the relatively high exclusion ratio of the eligible patients.
- Our findings may have been underpowered and represent type 2 statistical error.

## Introduction

Bacteremia causes bacterial bloodstream infection that is associated with a significant mortality<sup>1 2</sup>. In particular, the susceptibility to bacteremia is increased in elderly people who have decreased immunity due to various underlying diseases, such as diabetes and malignant disorders<sup>3</sup>. In recent years, the number of elderly people who are brought to the emergency department (ED) has increased in an aging society. Therefore, early diagnosis of bacteremia upon arrival at the ED is important.

Blood bacterial culture is the gold standard to diagnose bacteremia, but it requires several days to obtain the results<sup>4</sup>. Various biomarkers, including C-reactive protein (CRP) and procalcitonin (PCT), had been used to support the diagnosis of bacteremia<sup>5</sup>. Presepsin, which is the soluble fraction of cluster-of-differentiation 14 (CD14), had

1  
2  
3  
4  
5 been thought to be associated with infections<sup>6</sup>, based on the fact that a subtype of CD14  
6 is present inside and on the cell membranes of macrophages, monocytes, and  
7  
8 granulocytes and is responsible for intracellular transduction of endotoxin signals.  
9  
10 Several studies demonstrated that presepsin was more useful than PCT for the diagnosis  
11  
12 of sepsis<sup>7 8</sup>. In a systematic review and meta-analysis, presepsin levels were  
13  
14 significantly lower in sepsis survivors than in non-survivors<sup>9</sup>; however, most of these  
15  
16 presepsin levels were taken at the intensive care unit, not at the ED.  
17  
18  
19  
20

21 The aim of the present study was to evaluate the accuracy of presepsin, in comparison  
22  
23 with PCT and CRP, in predicting bacteremia in elderly patients admitted to the ED for  
24  
25 suspected infection with sepsis.  
26  
27

## 28 **Materials and methods**

### 29 *Patients and study design*

30  
31 This study was prospectively conducted at the ED of Osaka Medical College Hospital  
32  
33 between September 2014 and March 2016. Elderly patients aged  $\geq 70$  years and who  
34  
35 fulfilled the SIRS criteria or were suspected to have bacteremia were eligible to enroll in  
36  
37 this study. The exclusion criteria were terminal stage of malignant cancer, acquired  
38  
39 immunodeficiency syndrome or end-stage liver disease, and absence of patient or  
40  
41 relative consent to enroll in the study.  
42  
43  
44  
45

46 Upon arrival to the ED, all eligible patients underwent two sets of collection of 20 mL  
47  
48 of blood samples for bacterial cultures and one collection of 10 mL of blood for  
49  
50 measurements of CRP, PCT, and presepsin levels in plasma. SOFA<sup>10</sup> and APACHE II  
51  
52 scores were also evaluated. The plasma levels of the 3 biomarkers and the morbidity  
53  
54 scores were compared between 2 groups of patients: the bacteremia group (i.e., positive  
55  
56 result on bacterial blood cultures) and the non-bacteremia group (i.e., negative result on  
57  
58  
59  
60



1  
2  
3  
4  
5 bacterial blood cultures).

6  
7  
8 ***Measurement methods***  
9

10 The CRP, PCT, and presepsin levels were measured in the blood specimens collected  
11 at the ED before antimicrobial agent administration. Blood samples of presepsin were  
12 collected in tubes that contained ethylenediaminetetraacetic acid, with slow mixing  
13 followed by immediate centrifugation at 3,000 rpm for 10 minutes. The separated  
14 plasma of presepsin was collected and stored at  $-35^{\circ}\text{C}$  until analysis. Plasma presepsin  
15 levels were determined only by a chemiluminescent enzyme immunoassay  
16 (PATHFAST immunoassay analytical system; Mitsubishi Chemical Medience  
17 Corporation, Japan), according to the manufacturer's recommendations. After  
18 sterilization of the sites (either percutaneous or from a vascular access device) with the  
19 use of a chlorhexidine–alcohol mixture<sup>12</sup>, 2 sets of 10-mL blood were obtained (1 each  
20 for the aerobic and anaerobic bottles) and submitted to our central laboratory for culture.  
21  
22  
23  
24  
25  
26  
27  
28  
29  
30  
31  
32  
33  
34

35 ***Statistical analysis***  
36

37 Statistical analysis was performed using the JMP, version 13.0 (SAS Institute Inc.,  
38 Cary, NC, USA). Continuous variables were presented as mean  $\pm$  standard errors (SE)  
39 and were compared using the Wilcoxon rank sum test. A chi-square test was used to  
40 compare differences in the categorical variables. A multivariate logistic regression  
41 analysis model which objective variable was presence of bacteremia, explanatory  
42 variable was CRP, PCT, and presepsin was used to identify the influence of CRP, PCT,  
43 and presepsin on bacteremia. The receiver operating characteristic curve (ROC) was  
44 used to derive the optimal cutoff values, with sensitivity, specificity, predictive values,  
45 and likelihood ratios, of the biomarkers in predicting bacteremia and an area under the  
46 curve (AUC) differences were assessed with De Long test. A p-value of less than 0.05  
47  
48  
49  
50  
51  
52  
53  
54  
55  
56  
57  
58  
59  
60

was considered statistically significant.

### ***Patient and Public Involvement***

The development of the research question and outcome measures was informed by the elderly patients who have decreased immunity due various underlying diseases admitted to the ED. During the study design period, elderly patients aged  $\geq 70$  years and who fulfilled the SIRS criteria or were suspected to have bacteremia were invited to participate in this study. Written informed consent was obtained from each subject.

The results of our study will be disseminated to patient who wish to be notified.

The study protocol was approved by the ethics committee of Osaka Medical College (1585).

### **Results**

#### ***Characteristics of the study population and microbiology results***

Of 56 patients who were eligible for this study, 4 patients with terminal stage of malignant cancer, 4 patients with acquired immune deficiency syndrome, 1 patient with end-stage liver disease, and 1 patient who did not consent to enroll in this study were excluded. Therefore, 46 patients (28 men and 18 women) were included in this study. The mean age was  $78 \pm 6.7$  years. Blood cultures were positive in 16 cases (35%) and negative in 30 cases (65%). The isolated bacteria were Gram-positive microorganisms in 11 cases (*Staphylococcus caprae* in 1, *Staphylococcus epidermidis* in 5, *Staphylococcus hominis* in 1, *Lactobacillus acidophilus* in 1, *Enterococcus species* in 1, *Streptococcus species* in 1, and *Streptococcus equisimilis* in 1) and Gram-negative microorganisms in 5 cases (*Serratia marcescens* in 1, *Morganella morganii* in 1, *Klebsiella pneumoniae* in 1, and *Escherichia coli* in 1).

#### ***Comparison between the bacteremia and non-bacteremia groups***

1  
2  
3  
4  
5  
6 The univariate analysis showed no significant differences between the 2 groups in terms  
7  
8 of sex ( $p = 0.57$ ) and age ( $p = 0.86$ ) (Table 1). The presepsin value was significantly  
9  
10 higher in the bacteremia group than in the non-bacteremia group ( $866.6 \pm 184.6$  pg/mL  
11  
12 vs.  $639.9 \pm 137.1$  pg/mL,  $p = 0.03$ ). Both groups had similar PCT ( $p = 0.18$ ), CRP ( $p =$   
13  
14  $0.66$ ), SOFA ( $p = 0.07$ ), and APACHE II ( $p = 0.53$ ). The cutoff values derived from the  
15  
16 ROC curves were 285 pg/mL for presepsin, 15.8 ng/mL for PCT, and 34.6 mg/L for  
17  
18 CRP (Table 2). The AUC value of presepsin (0.69) did not significantly differ with that  
19  
20 of PCT (0.61,  $p = 0.30$ ) and CRP (0.53,  $p = 0.07$ ) (Figure 1).  
21  
22

23  
24 In the multivariate analysis, only presepsin was the independent risk factor for  
25  
26 bacteremia (hazard ratio, 8.84; 95% confidence interval, 0.95–81.79;  $p = 0.02$ ) (Table  
27  
28 3). Because the number of cases was small, so three biomarkers were examined in this  
29  
30 study.  
31  
32

### 33 Discussion

34  
35 Early diagnosis of bacteremia at the ED is very important for the initiation of  
36  
37 appropriate treatments and to improve outcomes, but it is not easy and often overlooked,  
38  
39 especially in elderly patients, in whom symptoms are not always straightforward and  
40  
41 can be misleading. In this prospective study on elderly patients admitted at the ED, we  
42  
43 found that 1) presepsin levels were higher with bacteremia than with non-bacteremia; 2)  
44  
45 presepsin was an independent predictor of bacteremia; and 3) there was no significant  
46  
47 difference in the AUC values among presepsin, PCT, and CRP. Therefore, presepsin  
48  
49 was superior than CRP and PCT in diagnosing bacteremia in elderly patients admitted  
50  
51 to the ED.  
52  
53

54  
55 Liu et al<sup>7</sup> and Carpio et al<sup>13</sup> reported that the cutoff values of presepsin for mortality in  
56  
57 septic ED patients were 556 and 825 pg/mL, respectively. Considering that the outcome  
58  
59  
60

1  
2  
3  
4  
5 of those studies was mortality, a cutoff value of 285 pg/mL for bacteremia in our study  
6  
7 might be reasonable. Romualdo et al reported that the cutoff value for bacteremic SIRS  
8  
9 was 729 pg/mL for ED patients with a mean age of 67 years<sup>14</sup>. Leli et al reported that  
10  
11 the cutoff value for bacteremia was 843.5 pg/mL for suspected sepsis ED not only in  
12  
13 various departments<sup>15</sup>. In our study, the sensitivity was 93.7% and the negative  
14  
15 predictive value was 92.3% at a cutoff value of 285 pg/mL for bacteremia. In elderly  
16  
17 patients who are more prone to infections, the cutoff value for bacteremia might be  
18  
19 lower, compared with that in young people.  
20  
21  
22

23  
24 Updated definitions of sepsis in 2016. Sepsis is defined as a life-threatening organ  
25  
26 dysfunction caused by a dysregulated response to infection. The diagnostic criteria for  
27  
28 sepsis use SOFA instead of SIRS<sup>16</sup>.  
29

30  
31 There were no significant differences in the SOFA and APACHE II scores between the  
32  
33 groups. Notably, such physiologic estimations might have been offset by the elderly  
34  
35 pathophysiologic characteristics, including dementia, which could have complicated  
36  
37 consciousness assessment; potential hypertension, which could have rendered the blood  
38  
39 pressure as normal; and the intake of various oral medications for other diseases.  
40  
41 Nevertheless, the stronger correlations with the SOFA or APACHE II scores of  
42  
43 presepsin than of PCT and CRP suggested that compared with PCT and CRP, presepsin  
44  
45 more likely reflected the disease severity of elderly patients upon arrival at the ED.  
46  
47  
48

49  
50 In this study, blood culture contaminations were likely. The median adult inpatient  
51  
52 blood culture contamination rate was reported to be only 2.5%<sup>17</sup> and 12.4% rate of  
53  
54 isolated coagulase-negative staphylococci (CNS) was reported to be clinically  
55  
56 significant<sup>18</sup>. Therefore, the presence of CNS in 7 of 16 (43%) positive blood cultures  
57  
58 might have significantly affected the results of this study. However, our study  
59  
60

1  
2  
3  
4  
5 population comprised elderly people who were susceptible to bacteremia due to  
6 decreased immunity; therefore, the probability of isolating the true pathogens on culture  
7 is higher than that in adults. The other limitations of the present study include the  
8 relatively small sample size, the single-center design, and the relatively high exclusion  
9 ratio of 18% (10 of 56) of the eligible patients. Therefore, our findings may have been  
10 underpowered and represent type 2 statistical error.  
11  
12  
13  
14  
15  
16  
17  
18

19 In our study, the PCT cutoff value of 15.8 ng/mL was higher as the ROC suggested  
20 than the past study <sup>5</sup>. The reason might be also explained by the small sample size and  
21 lack of data on patient's medical history.  
22  
23  
24  
25

26 Bacteremia can be identified in about 30% of septic patients and necessitates further  
27 diagnostic evaluation <sup>19</sup>. Therefore, the study which the primary outcome would be to  
28 pick up patients at risk of adverse outcomes and not just bacteremia should be  
29 necessary.  
30  
31  
32  
33  
34  
35  
36  
37

## 38 **Conclusion**

39  
40 This cohort study suggested that Presepsin could be more useful in detecting  
41 bacteremia in elderly patients admitted to the ED. Further study is needed to define the  
42 exact cutoff value for the prediction of bacteremia in these patients.  
43  
44  
45  
46  
47  
48  
49  
50

## 51 **Figure 1. Receiver-operating characteristic curve**

52 Diagnostic value of presepsin, PCT, and CRP for differentiating between positive and  
53 negative blood cultures  
54  
55  
56  
57  
58  
59  
60

**Table 1. Characteristics of the study population**

|                     | Non-bacteremia<br>(n = 30) | Bacteremia<br>(n = 46) | P-Value |
|---------------------|----------------------------|------------------------|---------|
| Age, years          | 77.30±1.23                 | 78.93±1.69             | 0.57    |
| Sex, n. male/female | 18/12                      | 10/6                   | 0.86    |
| Presepsin (pg/mL)   | 639.93±137.10              | 866.56±184.58          | 0.03    |
| PCT (ng/mL)         | 6.77±10.05                 | 45.04±13.76            | 0.18    |
| CRP (mg/L)          | 12.64±2.38                 | 15.41±3.26             | 0.66    |
| SOFA score          | 2.20±0.47                  | 4.2±0.65               | 0.07    |
| APACHE II score     | 13.63±1.0                  | 14.56±1.37             | 0.53    |

PCT: procalcitonin

CRP: C-reactive protein

SOFA: Sequential Organ Failure Assessment

APACH II : Acute Physiology and Chronic Health Evaluation

Continuous variables were presented as mean ± standard errors (SE)

**Table 2. Prediction of bacteremia**

|                   | Cutoff | Sensitivity, % | Specificity, % | PPV, % | NPV, % |
|-------------------|--------|----------------|----------------|--------|--------|
| Presepsin (pg/mL) | 285    | 93.7           | 41.3           | 46.8   | 92.3   |
| PCT (ng/mL)       | 15.8   | 43.7           | 86.7           | 63.6   | 74.2   |
| CRP (mg/L)        | 34.6   | 25             | 93.3           | 66.6   | 70     |

1  
2  
3  
4  
5  
6  
7  
8  
9  
10  
11  
12  
13  
14  
15  
16  
17  
18  
19  
20  
21  
22  
23  
24  
25  
26  
27  
28  
29  
30  
31  
32  
33  
34  
35  
36  
37  
38  
39  
40  
41  
42  
43  
44  
45  
46  
47  
48  
49  
50  
51  
52  
53  
54  
55  
56  
57  
58  
59  
60

PPV: positive predictive value, NPV: negative predictive value

**Table 3. Multivariate analysis of the risk factors for bacteremia**

|                   | Hazard ratio | 95%CI      | P-Value |
|-------------------|--------------|------------|---------|
| Presepsin (pg/mL) | 8.84         | 0.95-81.79 | 0.02    |
| PCT (ng/mL)       | 2.89         | 0.19-0.56  | 0.18    |
| CRP (mg/L)        | 0.65         | 0.06-6.54  | 0.71    |

95%CI: 95% confidence interval

### Data sharing statement

The data for this study were included in the manuscript. All data have been provided in the study and anyone is permitted to use the data provided that the article is properly cited.

### Abbreviations

ED; emergency department, PCT; procalcitonin, CRP; C-reactive protein

SOFA; Sequential Organ Failure Assessment, APACH II; Acute Physiology and

Chronic Health Evaluation, AUC; area under the receiver-operating-characteristic curve

ROC; receiver operating characteristic curve, CD14; cluster-of-differentiation 14

SIRS; systemic inflammatory response syndrome, CNS; coagulase-negative staphylococci

### Authors' Contributions

1  
2  
3  
4  
5  
6 Conception and design of the study: Y. Imai, A. Takasu. Acquisition of data: Y. Imai, R.  
7  
8 Iida, M. Nitta, A. Takasu. Analysis and interpretation of the data: Y. Imai, A. Takasu.  
9  
10 Material and financial support: Y. Imai, K. Taniguchi, R. Iida, M. Nitta, K. Uchiyama  
11  
12 and A. Takasu. Writing, review, and/or revision of the manuscript: Y. Imai, A. Takasu.  
13  
14  
15

### 16 **Acknowledgement:**

17  
18 We are grateful for the cooperation of the staff involved in emergency department.  
19  
20  
21  
22

### 23 **Funding Statement**

24  
25 This research received no specific grant from any funding agency in the public,  
26  
27 commercial, or not-for-profit sectors.  
28  
29

### 30 **Conflict of Interest:**

31  
32 None declared  
33  
34

### 35 **Data availability statement**

36  
37 No additional data available  
38  
39

### 40 **References**

- 41  
42  
43  
44  
45  
46  
47  
48 1. Martin GS, Mannino DM, Eaton S, et al. The epidemiology of sepsis in the United  
49  
50 States from 1979 through 2000. *N Engl J Med* 2003;348(16):1546-54. doi:  
51  
52 10.1056/NEJMoa022139 [published Online First: 2003/04/18]  
53  
54  
55  
56  
57 2. Thwaites GE, Scarborough M, Szubert A, et al. Adjunctive rifampicin to reduce early  
58  
59  
60



1  
2  
3  
4  
5  
6 mortality from *Staphylococcus aureus* bacteraemia: the ARREST RCT. *Health*  
7  
8  
9 *Technol Assess* 2018;22(59):1-148. doi: 10.3310/hta22590 [published Online  
10  
11  
12 First: 2018/11/02]

13  
14  
15 3. Martin GS, Mannino DM, Moss M. The effect of age on the development and  
16  
17  
18 outcome of adult sepsis. *Crit Care Med* 2006;34(1):15-21. [published Online  
19  
20  
21 First: 2005/12/24]

22  
23  
24 4. Flayhart D, Borek AP, Wakefield T, et al. Comparison of BACTEC PLUS blood culture  
25  
26  
27 media to BacT/Alert FA blood culture media for detection of bacterial  
28  
29  
30 pathogens in samples containing therapeutic levels of antibiotics. *J Clin*  
31  
32  
33 *Microbiol* 2007;45(3):816-21. doi: 10.1128/JCM.02064-06 [published Online  
34  
35  
36 First: 2006/12/15]

37  
38  
39 5. Hoeboer SH, van der Geest PJ, Nieboer D, et al. The diagnostic accuracy of  
40  
41  
42 procalcitonin for bacteraemia: a systematic review and meta-analysis. *Clin*  
43  
44  
45 *Microbiol Infect* 2015;21(5):474-81. doi: 10.1016/j.cmi.2014.12.026  
46  
47  
48 [published Online First: 2015/03/03]

49  
50  
51 6. Shozushima T, Takahashi G, Matsumoto N, et al. Usefulness of presepsin (sCD14-  
52  
53  
54 ST) measurements as a marker for the diagnosis and severity of sepsis that  
55  
56  
57 satisfied diagnostic criteria of systemic inflammatory response syndrome. *J*  
58  
59  
60

1  
2  
3  
4  
5  
6 *Infect Chemother* 2011;17(6):764-9. doi: 10.1007/s10156-011-0254-x

7  
8  
9 [published Online First: 2011/05/12]

10  
11  
12 7. Liu B, Chen YX, Yin Q, et al. Diagnostic value and prognostic evaluation of Presepsin

13  
14  
15 for sepsis in an emergency department. *Crit Care* 2013;17(5):R244. doi:

16  
17  
18 10.1186/cc13070 [published Online First: 2013/10/22]

19  
20  
21 8. Ulla M, Pizzolato E, Lucchiari M, et al. Diagnostic and prognostic value of presepsin

22  
23  
24 in the management of sepsis in the emergency department: a multicenter

25  
26  
27 prospective study. *Crit Care* 2013;17(4):R168. doi: 10.1186/cc12847

28  
29  
30 [published Online First: 2013/08/01]

31  
32  
33 9. Yang HS, Hur M, Yi A, et al. Prognostic value of presepsin in adult patients with

34  
35  
36 sepsis: Systematic review and meta-analysis. *PLoS One*

37  
38  
39 2018;13(1):e0191486. doi: 10.1371/journal.pone.0191486 [published Online

40  
41  
42 First: 2018/01/25]

43  
44  
45 10. Vincent JL, Moreno R, Takala J, et al. The SOFA (Sepsis-related Organ Failure

46  
47  
48 Assessment) score to describe organ dysfunction/failure. On behalf of the

49  
50  
51 Working Group on Sepsis-Related Problems of the European Society of

52  
53  
54 Intensive Care Medicine. *Intensive Care Med* 1996;22(7):707-10. [published

55  
56  
57 Online First: 1996/07/01]

- 1  
2  
3  
4  
5  
6  
7 11. Knaus WA, Draper EA, Wagner DP, et al. APACHE II: a severity of disease  
8  
9 classification system. *Crit Care Med* 1985;13(10):818-29. [published Online  
10  
11 First: 1985/10/01]  
12  
13  
14  
15 12. Maiwald M, Chan ES. The forgotten role of alcohol: a systematic review and meta-  
16  
17 analysis of the clinical efficacy and perceived role of chlorhexidine in skin  
18  
19 antisepsis. *PLoS One* 2012;7(9):e44277. doi: 10.1371/journal.pone.0044277  
20  
21  
22 [published Online First: 2012/09/18]  
23  
24  
25  
26  
27 13. Carpio R, Zapata J, Spanuth E, et al. Utility of presepsin (sCD14-ST) as a  
28  
29 diagnostic and prognostic marker of sepsis in the emergency department. *Clin*  
30  
31 *Chim Acta* 2015;450:169-75. doi: 10.1016/j.cca.2015.08.013 [published  
32  
33  
34  
35  
36  
37  
38 Online First: 2015/08/25]  
39  
40  
41 14. Romualdo LG, Torrella PE, Gonzalez MV, et al. Diagnostic accuracy of presepsin  
42  
43 (soluble CD14 subtype) for prediction of bacteremia in patients with systemic  
44  
45 inflammatory response syndrome in the Emergency Department. *Clin Biochem*  
46  
47  
48  
49 2014;47(7-8):505-8. doi: 10.1016/j.clinbiochem.2014.02.011 [published  
50  
51  
52  
53  
54  
55  
56  
57  
58  
59  
60 Online First: 2014/02/25]  
15. Leli C, Ferranti M, Marrano U, et al. Diagnostic accuracy of presepsin (sCD14-ST)  
and procalcitonin for prediction of bacteraemia and bacterial DNAemia in

- 1  
2  
3  
4  
5  
6 patients with suspected sepsis. *J Med Microbiol* 2016;65(8):713-9. doi:  
7  
8  
9 10.1099/jmm.0.000278 [published Online First: 2016/05/14]  
10  
11  
12 16. Levy MM, Evans LE, Rhodes A. The Surviving Sepsis Campaign Bundle: 2018  
13  
14  
15 Update. *Crit Care Med* 2018;46(6):997-1000. doi:  
16  
17  
18 10.1097/CCM.0000000000003119 [published Online First: 2018/05/17]  
19  
20  
21 17. Schiffman RB, Bachner P, Howanitz PJ. Blood culture quality improvement: a  
22  
23  
24 College of American Pathologists Q-Probes study involving 909 institutions and  
25  
26  
27 289 572 blood culture sets. *Arch Pathol Lab Med* 1996;120(11):999-1002.  
28  
29  
30 [published Online First: 1996/11/01]  
31  
32  
33 18. Weinstein MP, Towns ML, Quartey SM, et al. The clinical significance of positive  
34  
35  
36 blood cultures in the 1990s: a prospective comprehensive evaluation of the  
37  
38  
39 microbiology, epidemiology, and outcome of bacteremia and fungemia in  
40  
41  
42 adults. *Clin Infect Dis* 1997;24(4):584-602. [published Online First:  
43  
44  
45 1997/04/01]  
46  
47  
48 19. Bates DW, Sands K, Miller E, et al. Predicting bacteremia in patients with sepsis  
49  
50  
51 syndrome. Academic Medical Center Consortium Sepsis Project Working Group.  
52  
53  
54 *J Infect Dis* 1997;176(6):1538-51. doi: 10.1086/514153 [published Online  
55  
56  
57 First: 1997/12/12]  
58  
59  
60

1  
2  
3  
4  
5  
6  
7  
8  
9  
10  
11  
12  
13  
14  
15  
16  
17  
18  
19  
20  
21  
22  
23  
24  
25  
26  
27  
28  
29  
30  
31  
32  
33  
34  
35  
36  
37  
38  
39  
40  
41  
42  
43  
44  
45  
46  
47  
48  
49  
50  
51  
52  
53  
54  
55  
56  
57  
58  
59  
60

For peer review only

1  
2  
3  
4  
5  
6  
7  
8  
9  
10  
11  
12  
13  
14  
15  
16  
17  
18  
19  
20  
21  
22  
23  
24  
25  
26  
27  
28  
29  
30  
31  
32  
33  
34  
35  
36  
37  
38  
39  
40  
41  
42  
43  
44  
45  
46  
47  
48  
49  
50  
51  
52  
53  
54  
55  
56  
57  
58  
59  
60

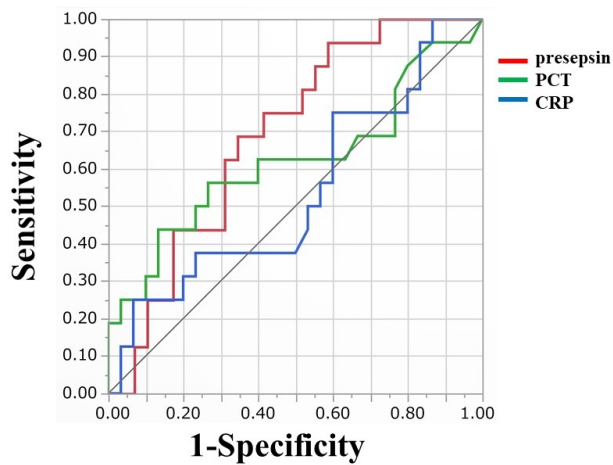

Receiver-operating characteristic curve

338x190mm (96 x 96 DPI)

| Section & Topic          | No  | Item                                                                                                                                                   | Reported on page # |
|--------------------------|-----|--------------------------------------------------------------------------------------------------------------------------------------------------------|--------------------|
| <b>TITLE OR ABSTRACT</b> |     |                                                                                                                                                        |                    |
|                          | 1   | Identification as a study of diagnostic accuracy using at least one measure of accuracy (such as sensitivity, specificity, predictive values, or AUC)  | 1                  |
| <b>ABSTRACT</b>          |     |                                                                                                                                                        |                    |
|                          | 2   | Structured summary of study design, methods, results, and conclusions (for specific guidance, see STARD for Abstracts)                                 | 2                  |
| <b>INTRODUCTION</b>      |     |                                                                                                                                                        |                    |
|                          | 3   | Scientific and clinical background, including the intended use and clinical role of the index test                                                     | 3                  |
|                          | 4   | Study objectives and hypotheses                                                                                                                        | 3                  |
| <b>METHODS</b>           |     |                                                                                                                                                        |                    |
| <i>Study design</i>      | 5   | Whether data collection was planned before the index test and reference standard were performed (prospective study) or after (retrospective study)     | 4                  |
| <i>Participants</i>      | 6   | Eligibility criteria                                                                                                                                   | 4                  |
|                          | 7   | On what basis potentially eligible participants were identified (such as symptoms, results from previous tests, inclusion in registry)                 | 4                  |
|                          | 8   | Where and when potentially eligible participants were identified (setting, location and dates)                                                         | 4,6                |
|                          | 9   | Whether participants formed a consecutive, random or convenience series                                                                                | 4,6                |
| <i>Test methods</i>      | 10a | Index test, in sufficient detail to allow replication                                                                                                  | 4,5                |
|                          | 10b | Reference standard, in sufficient detail to allow replication                                                                                          | 4,5                |
|                          | 11  | Rationale for choosing the reference standard (if alternatives exist)                                                                                  | 4,5                |
|                          | 12a | Definition of and rationale for test positivity cut-offs or result categories of the index test, distinguishing pre-specified from exploratory         | 5,6                |
|                          | 12b | Definition of and rationale for test positivity cut-offs or result categories of the reference standard, distinguishing pre-specified from exploratory | 5,6                |
|                          | 13a | Whether clinical information and reference standard results were available to the performers/readers of the index test                                 | 11                 |
|                          | 13b | Whether clinical information and index test results were available to the assessors of the reference standard                                          | 11                 |
| <i>Analysis</i>          | 14  | Methods for estimating or comparing measures of diagnostic accuracy                                                                                    | 5,6                |
|                          | 15  | How indeterminate index test or reference standard results were handled                                                                                | 5                  |
|                          | 16  | How missing data on the index test and reference standard were handled                                                                                 | 5                  |
|                          | 17  | Any analyses of variability in diagnostic accuracy, distinguishing pre-specified from exploratory                                                      | 5                  |
|                          | 18  | Intended sample size and how it was determined                                                                                                         | 4,6                |
| <b>RESULTS</b>           |     |                                                                                                                                                        |                    |
| <i>Participants</i>      | 19  | Flow of participants, using a diagram                                                                                                                  | 6                  |
|                          | 20  | Baseline demographic and clinical characteristics of participants                                                                                      | 6                  |
|                          | 21a | Distribution of severity of disease in those with the target condition                                                                                 | 6                  |
|                          | 21b | Distribution of alternative diagnoses in those without the target condition                                                                            | 6                  |
|                          | 22  | Time interval and any clinical interventions between index test and reference standard                                                                 | 7                  |
| <i>Test results</i>      | 23  | Cross tabulation of the index test results (or their distribution) by the results of the reference standard                                            | 7,11               |
|                          | 24  | Estimates of diagnostic accuracy and their precision (such as 95% confidence intervals)                                                                | 7,11               |
|                          | 25  | Any adverse events from performing the index test or the reference standard                                                                            |                    |
| <b>DISCUSSION</b>        |     |                                                                                                                                                        |                    |
|                          | 26  | Study limitations, including sources of potential bias, statistical uncertainty, and generalisability                                                  | 3,9                |
|                          | 27  | Implications for practice, including the intended use and clinical role of the index test                                                              | 8,9                |
| <b>OTHER INFORMATION</b> |     |                                                                                                                                                        |                    |
|                          | 28  | Registration number and name of registry                                                                                                               |                    |
|                          | 29  | Where the full study protocol can be accessed                                                                                                          | 12                 |
|                          | 30  | Sources of funding and other support; role of funders                                                                                                  | 12                 |

# STARD 2015

---

## AIM

STARD stands for “Standards for Reporting Diagnostic accuracy studies”. This list of items was developed to contribute to the completeness and transparency of reporting of diagnostic accuracy studies. Authors can use the list to write informative study reports. Editors and peer-reviewers can use it to evaluate whether the information has been included in manuscripts submitted for publication.

---

## EXPLANATION

A **diagnostic accuracy study** evaluates the ability of one or more medical tests to correctly classify study participants as having a **target condition**. This can be a disease, a disease stage, response or benefit from therapy, or an event or condition in the future. A medical test can be an imaging procedure, a laboratory test, elements from history and physical examination, a combination of these, or any other method for collecting information about the current health status of a patient.

The test whose accuracy is evaluated is called **index test**. A study can evaluate the accuracy of one or more index tests. Evaluating the ability of a medical test to correctly classify patients is typically done by comparing the distribution of the index test results with those of the **reference standard**. The reference standard is the best available method for establishing the presence or absence of the target condition. An accuracy study can rely on one or more reference standards.

If test results are categorized as either positive or negative, the cross tabulation of the index test results against those of the reference standard can be used to estimate the **sensitivity** of the index test (the proportion of participants *with* the target condition who have a positive index test), and its **specificity** (the proportion *without* the target condition who have a negative index test). From this cross tabulation (sometimes referred to as the contingency or “2x2” table), several other accuracy statistics can be estimated, such as the positive and negative **predictive values** of the test. Confidence intervals around estimates of accuracy can then be calculated to quantify the statistical **precision** of the measurements.

If the index test results can take more than two values, categorization of test results as positive or negative requires a **test positivity cut-off**. When multiple such cut-offs can be defined, authors can report a receiver operating characteristic (ROC) curve which graphically represents the combination of sensitivity and specificity for each possible test positivity cut-off. The **area under the ROC curve** informs in a single numerical value about the overall diagnostic accuracy of the index test.

The **intended use** of a medical test can be diagnosis, screening, staging, monitoring, surveillance, prediction or prognosis. The **clinical role** of a test explains its position relative to existing tests in the clinical pathway. A replacement test, for example, replaces an existing test. A triage test is used before an existing test; an add-on test is used after an existing test.

Besides diagnostic accuracy, several other outcomes and statistics may be relevant in the evaluation of medical tests. Medical tests can also be used to classify patients for purposes other than diagnosis, such as staging or prognosis. The STARD list was not explicitly developed for these other outcomes, statistics, and study types, although most STARD items would still apply.

---

## DEVELOPMENT

This STARD list was released in 2015. The 30 items were identified by an international expert group of methodologists, researchers, and editors. The guiding principle in the development of STARD was to select items that, when reported, would help readers to judge the potential for bias in the study, to appraise the applicability of the study findings and the validity of conclusions and recommendations. The list represents an update of the first version, which was published in 2003.

More information can be found on <http://www.equator-network.org/reporting-guidelines/stard>.

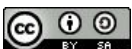



# BMJ Open

## Diagnostic accuracy of presepsin in predicting bacteremia in elderly patients admitted to the emergency department : prospective study in Japan

|                                 |                                                                                                                                                                                                                                                                                                                                                                                                                                                                |
|---------------------------------|----------------------------------------------------------------------------------------------------------------------------------------------------------------------------------------------------------------------------------------------------------------------------------------------------------------------------------------------------------------------------------------------------------------------------------------------------------------|
| Journal:                        | <i>BMJ Open</i>                                                                                                                                                                                                                                                                                                                                                                                                                                                |
| Manuscript ID                   | bmjopen-2019-030421.R2                                                                                                                                                                                                                                                                                                                                                                                                                                         |
| Article Type:                   | Original research                                                                                                                                                                                                                                                                                                                                                                                                                                              |
| Date Submitted by the Author:   | 20-Sep-2019                                                                                                                                                                                                                                                                                                                                                                                                                                                    |
| Complete List of Authors:       | Yoshiro, Imai; Osaka Medical College, general and gastroenterological surgery<br>Taniguchi, Kohei; Osaka Medical College, general and gastroenterological surgery<br>Ryo, Iida; Osaka Medical College, general and gastroenterological surgery<br>Masahiko, Nitta; Osaka Medical College, Emergency Medicine<br>Kazuhisa, Uchiyama; Osaka Medical College, general and gastroenterological surgery<br>Akira, Takasu; Osaka Medical College, Emergency Medicine |
| <b>Primary Subject Heading</b>: | Emergency medicine                                                                                                                                                                                                                                                                                                                                                                                                                                             |
| Secondary Subject Heading:      | Diagnostics                                                                                                                                                                                                                                                                                                                                                                                                                                                    |
| Keywords:                       | presepsin, elderly patients, bacteremia, emergency department, biomarker                                                                                                                                                                                                                                                                                                                                                                                       |
|                                 |                                                                                                                                                                                                                                                                                                                                                                                                                                                                |

SCHOLARONE™  
Manuscripts

**Title Page****Diagnostic accuracy of presepsin in predicting bacteremia in elderly patients admitted to the emergency department : prospective study in Japan**

Yoshiro Imai<sup>1)2)</sup> MD, PhD, Kohei Taniguchi<sup>1)2)</sup> MD, PhD, Ryo Iida<sup>1)2)</sup> MD,

Masahiko Nitta<sup>1)</sup> MD, PhD, Kazuhisa Uchiyama<sup>2)</sup> MD, PhD, Akira Takasu<sup>1)</sup> MD, PhD

1): Departments of Emergency Medicine, Osaka Medical College

2): Departments of General and Gastroenterological Surgery, Osaka Medical College

**Running title:**

presepsin in predicting bacteremia in elderly patients

**Corresponding author**

Yoshiro Imai, MD, PhD (corresponding author)

Departments of Emergency Medicine

Osaka Medical College

2-7 Daigakumachi, Takatsuki 569-8686(Japan)

E-mail [sur141@osaka-med.ac.jp](mailto:sur141@osaka-med.ac.jp)

Tel. +81-72-683-1221

Fax. +81-72-684-6262

**Keywords:** presepsin, elderly patients, bacteremia, emergency department, biomarker

**Abstract****Objective**

1  
2  
3  
4  
5 Early detection of bacteremia in the elderly is needed in the emergency department  
6  
7  
8 (ED).  
9

### 10 **Design, Setting, and Participants**

11  
12 Prospective study in Japan, single center trial in patients who satisfied the sepsis criteria  
13  
14 was conducted between September 2014 and March 2016. Forty-six elderly patients  
15  
16 aged  $\geq 70$  years were included.  
17

### 18 **Interventions**

19  
20 Blood sampling to evaluate C-reactive protein (CRP), procalcitonin (PCT) and  
21  
22 presepsin plasma levels; two sets of blood sampling for bacterial cultures; and  
23  
24 evaluations of the Sequential Organ Failure Assessment (SOFA) and Acute Physiology  
25  
26 and Chronic Health Evaluation (APACHE II) scores were performed upon arrival at the  
27  
28 ED. The results were compared between patients with bacteremia and those without  
29  
30 bacteremia.  
31  
32  
33  
34

### 35 **Main Outcome Measure**

36  
37 The accuracy of detecting bacteremia  
38  
39

### 40 **Results**

41  
42 The presepsin value was significantly higher in the bacteremia group than in the non-  
43  
44 bacteremia group ( $866.6 \pm 184.6$  pg/mL vs.  $639.9 \pm 137.1$  pg/mL,  $p = 0.03$ ). The PCT  
45  
46 and CRP did not significantly differ between the groups. The area under the receiver-  
47  
48 operating-characteristic curve (AUC) values were not significantly different among  
49  
50 presepsin (0.69), PCT (0.61), and CRP (0.53). Multivariate analysis showed that  
51  
52 presepsin was independently associated with bacteremia (odds ratio, 8.84; 95%  
53  
54 confidence interval, 0.95–81.79;  $p = 0.02$ ).  
55  
56  
57

### 58 **Conclusion**

1  
2  
3  
4  
5 Presepsin could be a good biomarker to predict bacteremia in elderly patients with  
6 sepsis criteria admitted to the ED.  
7  
8

#### 9 10 Funding

11  
12 This research received no specific grant from any funding agency in the public,  
13 commercial, or not-for-profit sectors.  
14  
15  
16  
17  
18

#### 19 *Strengths and limitations of this study*

- 20  
21
- 22 • The number of elderly people who are brought to the emergency department (ED) has  
23 increased in recent years. Moreover, decreased immunity due to various underlying  
24 diseases, such as diabetes and malignant disorders, make early diagnosis of bacteremia in  
25 the elderly important. This research was focused on the elderly, upon their arrival at the ED.  
26  
27
  - 28 • The present study had a relatively small sample size, a single-center design, and a  
29 relatively high exclusion ratio of eligible patients.  
30  
31
  - 32 • Our findings may have been underpowered and represented type 2 statistical error.  
33  
34  
35  
36  
37  
38  
39

#### 40 **Introduction**

41  
42 Bacteremia causes bacterial bloodstream infection that is associated with a significant  
43 mortality<sup>1 2</sup>. In particular, the susceptibility to bacteremia is increased in elderly people  
44 who have decreased immunity due to various underlying diseases, such as diabetes and  
45 malignant disorders<sup>3</sup>. In recent years, the number of elderly people who are brought to  
46 the emergency department (ED) has increased in an aging society. Therefore, early  
47 prediction of bacteremia upon arrival at the ED is important.  
48  
49  
50  
51  
52  
53

54  
55 Blood bacterial culture is the gold standard to diagnose bacteremia, but it requires  
56 several days to obtain the results<sup>4</sup>. Various biomarkers, including C-reactive protein  
57  
58  
59  
60

(CRP) and procalcitonin (PCT), had been used to support the diagnosis of bacteremia<sup>5</sup>.

Presepsin, which is the soluble fraction of cluster-of-differentiation 14 (CD14), had been thought to be associated with infections<sup>6</sup>, based on the fact that a subtype of CD14 is present inside and on the cell membranes of macrophages, monocytes, and granulocytes and is responsible for intracellular transduction of endotoxin signals.

Several studies demonstrated that presepsin was more useful than PCT for the diagnosis of sepsis<sup>7,8</sup>. In a systematic review and meta-analysis, presepsin levels were significantly lower in sepsis survivors than in non-survivors<sup>9</sup>; however, most of these presepsin levels were taken at the intensive care unit, not at the ED.

The aim of the present study was to evaluate the accuracy of presepsin, in comparison with PCT and CRP, in predicting bacteremia in elderly patients admitted to the ED for suspected infection with sepsis.

## **Materials and methods**

### ***Patients and study design***

This study was prospectively conducted at the ED of Osaka Medical College Hospital between September 2014 and March 2016. Elderly patients aged  $\geq 70$  years and who fulfilled the SIRS criteria or were suspected to have bacteremia were eligible to enroll in this study. The exclusion criteria were terminal stage of malignant cancer, acquired immunodeficiency syndrome or end-stage liver disease, and absence of patient or relative consent to enroll in the study.

Upon arrival to the ED, all eligible patients underwent two sets of collection of 20 mL of blood samples for bacterial cultures and one collection of 10 mL of blood for measurements of CRP, PCT, and presepsin levels in plasma. SOFA<sup>10</sup> and APACHE II

1  
2  
3  
4  
5  
6  
7  
8  
9  
10  
11  
12  
13  
14  
15  
16  
17  
18  
19  
20  
21  
22  
23  
24  
25  
26  
27  
28  
29  
30  
31  
32  
33  
34  
35  
36  
37  
38  
39  
40  
41  
42  
43  
44  
45  
46  
47  
48  
49  
50  
51  
52  
53  
54  
55  
56  
57  
58  
59  
60

<sup>11</sup> scores were also evaluated. The plasma levels of the 3 biomarkers and the morbidity scores were compared between 2 groups of patients: the bacteremia group (i.e., positive result on bacterial blood cultures) and the non-bacteremia group (i.e., negative result on bacterial blood cultures).

### ***Measurement methods***

Written informed consent was obtained from each subject. The results of our study will be disseminated to patient who wish to be notified. The study protocol was approved by the ethics committee of Osaka Medical College. Ethics Committee approval number was 1585.

The CRP, PCT, and presepsin levels were measured in the blood specimens collected at the ED before antimicrobial agent administration. Blood samples of presepsin were collected in tubes that contained ethylenediaminetetraacetic acid, with slow mixing followed by immediate centrifugation at 3,000 rpm for 10 minutes. The separated plasma of presepsin was collected and stored at  $-35^{\circ}\text{C}$  until analysis. Plasma presepsin levels were determined only by a chemiluminescent enzyme immunoassay (PATHFAST immunoassay analytical system; Mitsubishi Chemical Medience Corporation, Japan), according to the manufacturer's recommendations. After sterilization of the sites (either percutaneous or from a vascular access device) with the use of a chlorhexidine–alcohol mixture<sup>12</sup>, 2 sets of 10-mL blood were obtained (1 each for the aerobic and anaerobic bottles) and submitted to our central laboratory for culture.

### ***Statistical analysis***

Statistical analysis was performed using the JMP, version 13.0 (SAS Institute Inc., Cary, NC, USA). Continuous variables were presented as mean  $\pm$  standard errors (SE)

1  
2  
3  
4  
5 and were compared using the Wilcoxon rank sum test. A chi-square test was used to  
6  
7 compare differences in the categorical variables. A multivariate logistic regression  
8  
9 analysis model which response variable was presence of bacteremia, explanatory  
10  
11 variables were CRP, PCT, and presepsin was used to identify the influence of CRP,  
12  
13 PCT, and presepsin on bacteremia. The receiver operating characteristic curve (ROC)  
14  
15 was used to derive the optimal cutoff values, with sensitivity, specificity, predictive  
16  
17 values, and likelihood ratios, of the biomarkers in predicting bacteremia and an area  
18  
19 under the curve (AUC) differences were assessed with De Long test. A p-value of less  
20  
21 than 0.05 was considered statistically significant.  
22  
23  
24  
25

### 26 ***Patient and Public Involvement***

27  
28 The development of the research question and outcome measures was informed by the  
29  
30 elderly patients who have decreased immunity due various underlying diseases admitted  
31  
32 to the ED. During the study design period, elderly patients aged  $\geq 70$  years and who  
33  
34 fulfilled the SIRS criteria or were suspected to have bacteremia were invited to  
35  
36 participate in this study.  
37  
38  
39  
40  
41

## 42 **Results**

### 43 ***Characteristics of the study population and microbiology results***

44  
45 Of 56 patients who were eligible for this study, 4 patients with terminal stage of  
46  
47 malignant cancer, 4 patients with acquired immune deficiency syndrome, 1 patient with  
48  
49 end-stage liver disease, and 1 patient who did not consent to enroll in this study were  
50  
51 excluded. Therefore, 46 patients (28 men and 18 women) were included. The isolated  
52  
53 bacteria were Gram-positive microorganisms in 11 cases (*Staphylococcus caprae* in 1,  
54  
55 *Staphylococcus epidermidis* in 5, *Staphylococcus hominis* in 1, *Lactobacillus*  
56  
57  
58  
59  
60

1  
2  
3  
4  
5  
6 *acidophilus* in 1, *Enterococcus species* in 1, *Streptococcus species* in 1, and  
7  
8 *Streptococcus equisimilis* in 1) and Gram-negative microorganisms in 4 cases (*Serratia*  
9  
10 *marcescens* in 1, *Morganella morganii* in 1, *Klebsiella pneumoniae* in 1, and  
11  
12 *Escherichia coli* in 1).

### 13 14 **Comparison between the bacteremia and non-bacteremia groups**

15  
16  
17 The univariate analysis showed no significant differences between the 2 groups in terms  
18  
19 of sex ( $p = 0.57$ ) and age ( $p = 0.86$ ) (Table 1). The presepsin value was significantly  
20  
21 higher in the bacteremia group than in the non-bacteremia group ( $866.6 \pm 184.6$  pg/mL  
22  
23 vs.  $639.9 \pm 137.1$  pg/mL,  $p = 0.03$ ). Both groups were not significantly different PCT ( $p$   
24  
25  $= 0.18$ ), CRP ( $p = 0.66$ ), SOFA ( $p = 0.07$ ), and APACHE II ( $p = 0.53$ ). The cutoff  
26  
27 values derived from the ROC curves were 285 pg/mL for presepsin, 15.8 ng/mL for  
28  
29 PCT, and 34.6 mg/L for CRP (Table 2). The AUC value of presepsin (0.69) did not  
30  
31 significantly differ with that of PCT (0.61,  $p = 0.30$ ) and CRP (0.53,  $p = 0.07$ ) (Figure  
32  
33  
34  
35  
36  
37  
38  
39  
40  
41  
42  
43  
44  
45  
46  
47  
48  
49  
50  
51  
52  
53  
54  
55  
56  
57  
58  
59  
60  
1).

In the multivariate analysis, only presepsin was the only significant risk factor for  
bacteremia (odds ratio, 8.84; 95% confidence interval, 0.95–81.79;  $p = 0.02$ ). Because  
the number of cases was small, so three biomarkers were examined in this study.

### 44 45 **Discussion**

46  
47 Early diagnosis of bacteremia at the ED is very important for the initiation of  
48  
49 appropriate treatments and to improve outcomes, but it is not easy and often overlooked,  
50  
51 especially in elderly patients, in whom symptoms are not always straightforward and  
52  
53 can be misleading. In this prospective study on elderly patients admitted at the ED, we  
54  
55 found that 1) presepsin levels were higher with bacteremia than with non-bacteremia; 2)  
56  
57 presepsin was an independent predictor of bacteremia; and 3) there was no significant  
58  
59  
60



1  
2  
3  
4  
5  
6 difference in the AUC values among presepsin, PCT, and CRP. Therefore, presepsin  
7  
8 was superior to CRP and PCT in predicting bacteremia in elderly patients admitted to  
9  
10 the ED.

11  
12 Liu et al<sup>7</sup> and Carpio et al<sup>13</sup> reported that the cutoff values of presepsin for mortality in  
13  
14 septic ED patients were 556 and 825 pg/mL, respectively. Considering that the outcome  
15  
16 of those studies was mortality, a cutoff value of 285 pg/mL for bacteremia in our study  
17  
18 might be reasonable. Romualdo et al reported that the cutoff value for bacteremic SIRS  
19  
20 was 729 pg/mL for ED patients with a mean age of 67 years<sup>14</sup>. Leli et al reported that  
21  
22 the cutoff value for bacteremia was 843.5 pg/mL for suspected sepsis ED not only in  
23  
24 various departments<sup>15</sup>. In our study, the sensitivity was 93.7% and the negative  
25  
26 predictive value was 92.3% at a cutoff value of 285 pg/mL for bacteremia. In elderly  
27  
28 patients who are more prone to infections, the cutoff value for bacteremia might be  
29  
30 lower, compared with that in young people.  
31  
32  
33  
34

35  
36 There were no significant differences in the SOFA and APACHE II scores between the  
37  
38 groups. Notably, such physiologic estimations might have been offset by the elderly  
39  
40 pathophysiologic characteristics, including dementia, which could have complicated  
41  
42 consciousness assessment; potential hypertension, which could have rendered the blood  
43  
44 pressure as normal; and the intake of various oral medications for other diseases.  
45  
46 Nevertheless, the stronger correlations with the SOFA or APACHE II scores of  
47  
48 presepsin than of PCT and CRP suggested that compared with PCT and CRP, presepsin  
49  
50 more likely reflected the disease severity of elderly patients upon arrival at the ED.  
51  
52  
53

54  
55 In this study, blood culture contaminations were likely. The median adult inpatient  
56  
57 blood culture contamination rate was reported to be only 2.5%<sup>16</sup> and 12.4% rate of  
58  
59 isolated coagulase-negative staphylococci (CNS) was reported to be clinically  
60

1  
2  
3  
4  
5 significant<sup>17</sup>. Therefore, the presence of CNS in 7 of 16 (43%) positive blood cultures  
6  
7 might have significantly affected the results of this study. However, our study  
8  
9 population comprised elderly people who were susceptible to bacteremia due to  
10  
11 decreased immunity; therefore, the probability of isolating the true pathogens on culture  
12  
13 is higher than that in adults. The other limitations of the present study include the  
14  
15 relatively small sample size, the single-center design, and the relatively high exclusion  
16  
17 ratio of 18% (10 of 56) of the eligible patients. Therefore, our findings may have been  
18  
19 underpowered and represent type 2 statistical error.  
20  
21  
22

23  
24 In our study, the PCT cutoff value of 15.8 ng/mL was higher as the ROC suggested by  
25  
26 the ROC was higher than in a previous study<sup>5</sup>. The reason might be also explained by  
27  
28 the small sample size and lack of data on patient's medical history.  
29

30  
31 Bacteremia can be identified in about 30% of septic patients and necessitates further  
32  
33 diagnostic evaluation<sup>18</sup>. Therefore, studies are needed in which the primary outcome  
34  
35 would be to pick up patients at risk of adverse outcomes, not just the presence of  
36  
37 bacteremia  
38

## 39 40 41 42 **Conclusion**

43  
44  
45 This cohort study suggested that Presepsin could be more useful than PCT and CRP in  
46  
47 predicting bacteremia in elderly patients admitted to the ED. Further studies are needed  
48  
49 to define the exact cutoff value for the prediction of bacteremia in these patients.  
50  
51  
52

## 53 54 55 **Figure 1. Receiver-operating characteristic curve**

56  
57  
58 Diagnostic value of presepsin, PCT, and CRP for differentiating between positive and  
59  
60

negative blood cultures

**Table 1. Characteristics of the study population**

|                       | Non-bacteremia<br>(n = 30) | Bacteremia<br>(n = 46) | P-Value<br>(The univariate<br>analysis) | Odds ratio | 95%CI      | P-Value<br>(The multivariate<br>analysis) |
|-----------------------|----------------------------|------------------------|-----------------------------------------|------------|------------|-------------------------------------------|
| Age, years            | 77.30±1.23                 | 78.93±1.69             | 0.57                                    | N/A        | N/A        | N/A                                       |
| Sex,n.<br>male/female | 18/12                      | 10/6                   | 0.86                                    | N/A        | N/A        | N/A                                       |
| Presepsin<br>(pg/mL)  | 639.93±137.10              | 866.56±184.58          | 0.03                                    | 8.84       | 0.95-81.79 | 0.02                                      |
| PCT (ng/mL)           | 6.77±10.05                 | 45.04±13.76            | 0.18                                    | 2.89       | 0.19-0.56  | 0.18                                      |
| CRP (mg/L)            | 12.64±2.38                 | 15.41±3.26             | 0.66                                    | 0.65       | 0.06-6.54  | 0.71                                      |
| SOFA score            | 2.20±0.47                  | 4.2±0.65               | 0.07                                    | N/A        | N/A        | N/A                                       |
| APACHE II<br>score    | 13.63±1.0                  | 14.56±1.37             | 0.53                                    | N/A        | N/A        | N/A                                       |

PCT: procalcitonin

CRP: C-reactive protein

SOFA: Sequential Organ Failure Assessment

APACH II : Acute Physiology and Chronic Health Evaluation

Continuous variables were presented as mean ± standard errors (SE)

95%CI: 95% confidence interval

N/A: not available

**Table 2. Prediction of bacteremia**

|                   | Cutoff | Sensitivity, % | Specificity, % | PPV, % | NPV, % |
|-------------------|--------|----------------|----------------|--------|--------|
| Presepsin (pg/mL) | 285    | 93.7           | 41.3           | 46.8   | 92.3   |
| PCT (ng/mL)       | 15.8   | 43.7           | 86.7           | 63.6   | 74.2   |
| CRP (mg/L)        | 34.6   | 25             | 93.3           | 66.6   | 70     |

PPV: positive predictive value, NPV: negative predictive value

#### Data sharing statement

Extra data can be accessed via the Dryad data repository at <http://datadryad.org/> with the doi: 10.5061/dryad.rbnzs7h70

#### Abbreviations

ED; emergency department, PCT; procalcitonin, CRP; C-reactive protein

SOFA; Sequential Organ Failure Assessment, APACH II; Acute Physiology and

Chronic Health Evaluation, AUC; area under the receiver-operating-characteristic curve

ROC; receiver operating characteristic curve, CD14; cluster-of-differentiation 14

SIRS; systemic inflammatory response syndrome, CNS; coagulase-negative

staphylococci

#### Authors' Contributions

Conception and design of the study: Y. Imai, A. Takasu. Acquisition of data: Y. Imai, R.

Iida, M. Nitta, A. Takasu. Analysis and interpretation of the data: Y. Imai, A. Takasu.

Material and financial support: Y. Imai, K. Taniguchi, R. Iida, M. Nitta, K. Uchiyama

and A. Takasu. Writing, review, and/or revision of the manuscript: Y. Imai, A. Takasu.

### **Acknowledgement:**

We are grateful for the cooperation of the staff involved in emergency department.

### **Funding Statement**

This research received no specific grant from any funding agency in the public, commercial, or not-for-profit sectors.

### **Conflict of Interest:**

None

### **References**

1. Martin GS, Mannino DM, Eaton S, et al. The epidemiology of sepsis in the United States from 1979 through 2000. *N Engl J Med* 2003;348(16):1546–54. doi: 10.1056/NEJMoa022139 [published Online First: 2003/04/18]
2. Thwaites GE, Scarborough M, Szubert A, et al. Adjunctive rifampicin to reduce early mortality from *Staphylococcus aureus* bacteraemia: the ARREST RCT. *Health Technol Assess* 2018;22(59):1–148. doi: 10.3310/hta22590 [published Online First: 2018/11/02]
3. Martin GS, Mannino DM, Moss M. The effect of age on the development and outcome of adult sepsis. *Crit Care Med* 2006;34(1):15–21. [published Online First: 2005/12/24]
4. Flayhart D, Borek AP, Wakefield T, et al. Comparison of BACTEC PLUS blood culture media to BacT/Alert FA blood culture media for detection of bacterial pathogens in samples containing therapeutic levels of antibiotics. *J Clin Microbiol* 2007;45(3):816–21. doi: 10.1128/JCM.02064-06 [published Online

- 1  
2  
3  
4  
5  
6 First: 2006/12/15]
- 7 5. Hoeboer SH, van der Geest PJ, Nieboer D, et al. The diagnostic accuracy of  
8 procalcitonin for bacteraemia: a systematic review and meta-analysis. *Clin*  
9 *Microbiol Infect* 2015;21(5):474-81. doi: 10.1016/j.cmi.2014.12.026 [published  
10 Online First: 2015/03/03]
- 11  
12  
13 6. Shozushima T, Takahashi G, Matsumoto N, et al. Usefulness of presepsin (sCD14-ST)  
14 measurements as a marker for the diagnosis and severity of sepsis that  
15 satisfied diagnostic criteria of systemic inflammatory response syndrome. *J*  
16 *Infect Chemother* 2011;17(6):764-9. doi: 10.1007/s10156-011-0254-x [published  
17 Online First: 2011/05/12]
- 18  
19  
20 7. Liu B, Chen YX, Yin Q, et al. Diagnostic value and prognostic evaluation of  
21 Presepsin for sepsis in an emergency department. *Crit Care* 2013;17(5):R244.  
22 doi: 10.1186/cc13070 [published Online First: 2013/10/22]
- 23  
24  
25 8. Ulla M, Pizzolato E, Lucchiari M, et al. Diagnostic and prognostic value of  
26 presepsin in the management of sepsis in the emergency department: a  
27 multicenter prospective study. *Crit Care* 2013;17(4):R168. doi:  
28 10.1186/cc12847 [published Online First: 2013/08/01]
- 29  
30  
31 9. Yang HS, Hur M, Yi A, et al. Prognostic value of presepsin in adult patients with  
32 sepsis: Systematic review and meta-analysis. *PLoS One* 2018;13(1):e0191486.  
33 doi: 10.1371/journal.pone.0191486 [published Online First: 2018/01/25]
- 34  
35  
36 10. Vincent JL, Moreno R, Takala J, et al. The SOFA (Sepsis-related Organ Failure  
37 Assessment) score to describe organ dysfunction/failure. On behalf of the  
38 Working Group on Sepsis-Related Problems of the European Society of Intensive  
39 Care Medicine. *Intensive Care Med* 1996;22(7):707-10. [published Online First:  
40 1996/07/01]
- 41  
42  
43 11. Knaus WA, Draper EA, Wagner DP, et al. APACHE II: a severity of disease  
44 classification system. *Crit Care Med* 1985;13(10):818-29. [published Online  
45 First: 1985/10/01]
- 46  
47  
48 12. Maiwald M, Chan ES. The forgotten role of alcohol: a systematic review and meta-  
49 analysis of the clinical efficacy and perceived role of chlorhexidine in skin  
50 antisepsis. *PLoS One* 2012;7(9):e44277. doi: 10.1371/journal.pone.0044277  
51 [published Online First: 2012/09/18]
- 52  
53  
54 13. Carpio R, Zapata J, Spanuth E, et al. Utility of presepsin (sCD14-ST) as a  
55 diagnostic and prognostic marker of sepsis in the emergency department. *Clin*  
56 *Chim Acta* 2015;450:169-75. doi: 10.1016/j.cca.2015.08.013 [published Online  
57 First: 2015/08/25]
- 58  
59  
60

- 1  
2  
3  
4  
5  
6 14. Romualdo LG, Torrella PE, Gonzalez MV, et al. Diagnostic accuracy of presepsin  
7 (soluble CD14 subtype) for prediction of bacteremia in patients with systemic  
8 inflammatory response syndrome in the Emergency Department. *Clin Biochem*  
9 2014;47(7-8):505-8. doi: 10.1016/j.clinbiochem.2014.02.011 [published Online  
10 First: 2014/02/25]  
11  
12  
13 15. Leli C, Ferranti M, Marrano U, et al. Diagnostic accuracy of presepsin (sCD14-ST)  
14 and procalcitonin for prediction of bacteraemia and bacterial DNAemia in  
15 patients with suspected sepsis. *J Med Microbiol* 2016;65(8):713-9. doi:  
16 10.1099/jmm.0.000278 [published Online First: 2016/05/14]  
17  
18  
19 16. Schiffman RB, Bachner P, Howanitz PJ. Blood culture quality improvement: a College  
20 of American Pathologists Q-Probes study involving 909 institutions and 289  
21 572 blood culture sets. *Arch Pathol Lab Med* 1996;120(11):999-1002. [published  
22 Online First: 1996/11/01]  
23  
24  
25 17. Weinstein MP, Towns ML, Quartey SM, et al. The clinical significance of positive  
26 blood cultures in the 1990s: a prospective comprehensive evaluation of the  
27 microbiology, epidemiology, and outcome of bacteremia and fungemia in adults.  
28 *Clin Infect Dis* 1997;24(4):584-602. [published Online First: 1997/04/01]  
29  
30  
31 18. Bates DW, Sands K, Miller E, et al. Predicting bacteremia in patients with sepsis  
32 syndrome. Academic Medical Center Consortium Sepsis Project Working Group. *J*  
33 *Infect Dis* 1997;176(6):1538-51. doi: 10.1086/514153 [published Online First:  
34 1997/12/12]  
35  
36  
37  
38  
39  
40  
41  
42  
43  
44  
45  
46  
47  
48  
49  
50  
51  
52  
53  
54  
55  
56  
57  
58  
59  
60

1  
2  
3  
4  
5  
6  
7  
8  
9  
10  
11  
12  
13  
14  
15  
16  
17  
18  
19  
20  
21  
22  
23  
24  
25  
26  
27  
28  
29  
30  
31  
32  
33  
34  
35  
36  
37  
38  
39  
40  
41  
42  
43  
44  
45  
46  
47  
48  
49  
50  
51  
52  
53  
54  
55  
56  
57  
58  
59  
60

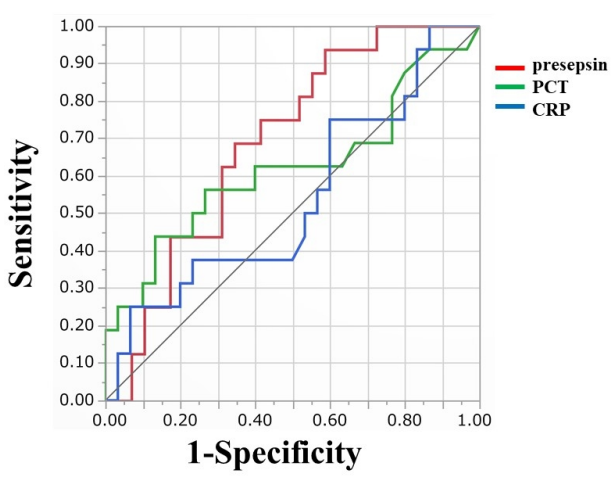

Receiver-operating characteristic curve

338x190mm (96 x 96 DPI)



| Section & Topic          | No  | Item                                                                                                                                                   | Reported on page # |
|--------------------------|-----|--------------------------------------------------------------------------------------------------------------------------------------------------------|--------------------|
| <b>TITLE OR ABSTRACT</b> |     |                                                                                                                                                        |                    |
|                          | 1   | Identification as a study of diagnostic accuracy using at least one measure of accuracy (such as sensitivity, specificity, predictive values, or AUC)  | 1                  |
| <b>ABSTRACT</b>          |     |                                                                                                                                                        |                    |
|                          | 2   | Structured summary of study design, methods, results, and conclusions (for specific guidance, see STARD for Abstracts)                                 | 2                  |
| <b>INTRODUCTION</b>      |     |                                                                                                                                                        |                    |
|                          | 3   | Scientific and clinical background, including the intended use and clinical role of the index test                                                     | 3                  |
|                          | 4   | Study objectives and hypotheses                                                                                                                        | 3                  |
| <b>METHODS</b>           |     |                                                                                                                                                        |                    |
| <i>Study design</i>      | 5   | Whether data collection was planned before the index test and reference standard were performed (prospective study) or after (retrospective study)     | 4                  |
| <i>Participants</i>      | 6   | Eligibility criteria                                                                                                                                   | 4                  |
|                          | 7   | On what basis potentially eligible participants were identified (such as symptoms, results from previous tests, inclusion in registry)                 | 4                  |
|                          | 8   | Where and when potentially eligible participants were identified (setting, location and dates)                                                         | 4,6                |
|                          | 9   | Whether participants formed a consecutive, random or convenience series                                                                                | 4,6                |
| <i>Test methods</i>      | 10a | Index test, in sufficient detail to allow replication                                                                                                  | 4,5                |
|                          | 10b | Reference standard, in sufficient detail to allow replication                                                                                          | 4,5                |
|                          | 11  | Rationale for choosing the reference standard (if alternatives exist)                                                                                  | 4,5                |
|                          | 12a | Definition of and rationale for test positivity cut-offs or result categories of the index test, distinguishing pre-specified from exploratory         | 5,6                |
|                          | 12b | Definition of and rationale for test positivity cut-offs or result categories of the reference standard, distinguishing pre-specified from exploratory | 5,6                |
|                          | 13a | Whether clinical information and reference standard results were available to the performers/readers of the index test                                 | 11                 |
|                          | 13b | Whether clinical information and index test results were available to the assessors of the reference standard                                          | 11                 |
| <i>Analysis</i>          | 14  | Methods for estimating or comparing measures of diagnostic accuracy                                                                                    | 5,6                |
|                          | 15  | How indeterminate index test or reference standard results were handled                                                                                | 5                  |
|                          | 16  | How missing data on the index test and reference standard were handled                                                                                 | 5                  |
|                          | 17  | Any analyses of variability in diagnostic accuracy, distinguishing pre-specified from exploratory                                                      | 5                  |
|                          | 18  | Intended sample size and how it was determined                                                                                                         | 4,6                |
| <b>RESULTS</b>           |     |                                                                                                                                                        |                    |
| <i>Participants</i>      | 19  | Flow of participants, using a diagram                                                                                                                  | 6                  |
|                          | 20  | Baseline demographic and clinical characteristics of participants                                                                                      | 6                  |
|                          | 21a | Distribution of severity of disease in those with the target condition                                                                                 | 6                  |
|                          | 21b | Distribution of alternative diagnoses in those without the target condition                                                                            | 6                  |
|                          | 22  | Time interval and any clinical interventions between index test and reference standard                                                                 | 7                  |
| <i>Test results</i>      | 23  | Cross tabulation of the index test results (or their distribution) by the results of the reference standard                                            | 7,11               |
|                          | 24  | Estimates of diagnostic accuracy and their precision (such as 95% confidence intervals)                                                                | 7,11               |
|                          | 25  | Any adverse events from performing the index test or the reference standard                                                                            |                    |
| <b>DISCUSSION</b>        |     |                                                                                                                                                        |                    |
|                          | 26  | Study limitations, including sources of potential bias, statistical uncertainty, and generalisability                                                  | 3,9                |
|                          | 27  | Implications for practice, including the intended use and clinical role of the index test                                                              | 8,9                |
| <b>OTHER INFORMATION</b> |     |                                                                                                                                                        |                    |
|                          | 28  | Registration number and name of registry                                                                                                               |                    |
|                          | 29  | Where the full study protocol can be accessed                                                                                                          | 12                 |
|                          | 30  | Sources of funding and other support; role of funders                                                                                                  | 12                 |

# STARD 2015

---

## AIM

STARD stands for “Standards for Reporting Diagnostic accuracy studies”. This list of items was developed to contribute to the completeness and transparency of reporting of diagnostic accuracy studies. Authors can use the list to write informative study reports. Editors and peer-reviewers can use it to evaluate whether the information has been included in manuscripts submitted for publication.

---

## EXPLANATION

A **diagnostic accuracy study** evaluates the ability of one or more medical tests to correctly classify study participants as having a **target condition**. This can be a disease, a disease stage, response or benefit from therapy, or an event or condition in the future. A medical test can be an imaging procedure, a laboratory test, elements from history and physical examination, a combination of these, or any other method for collecting information about the current health status of a patient.

The test whose accuracy is evaluated is called **index test**. A study can evaluate the accuracy of one or more index tests. Evaluating the ability of a medical test to correctly classify patients is typically done by comparing the distribution of the index test results with those of the **reference standard**. The reference standard is the best available method for establishing the presence or absence of the target condition. An accuracy study can rely on one or more reference standards.

If test results are categorized as either positive or negative, the cross tabulation of the index test results against those of the reference standard can be used to estimate the **sensitivity** of the index test (the proportion of participants *with* the target condition who have a positive index test), and its **specificity** (the proportion *without* the target condition who have a negative index test). From this cross tabulation (sometimes referred to as the contingency or “2x2” table), several other accuracy statistics can be estimated, such as the positive and negative **predictive values** of the test. Confidence intervals around estimates of accuracy can then be calculated to quantify the statistical **precision** of the measurements.

If the index test results can take more than two values, categorization of test results as positive or negative requires a **test positivity cut-off**. When multiple such cut-offs can be defined, authors can report a receiver operating characteristic (ROC) curve which graphically represents the combination of sensitivity and specificity for each possible test positivity cut-off. The **area under the ROC curve** informs in a single numerical value about the overall diagnostic accuracy of the index test.

The **intended use** of a medical test can be diagnosis, screening, staging, monitoring, surveillance, prediction or prognosis. The **clinical role** of a test explains its position relative to existing tests in the clinical pathway. A replacement test, for example, replaces an existing test. A triage test is used before an existing test; an add-on test is used after an existing test.

Besides diagnostic accuracy, several other outcomes and statistics may be relevant in the evaluation of medical tests. Medical tests can also be used to classify patients for purposes other than diagnosis, such as staging or prognosis. The STARD list was not explicitly developed for these other outcomes, statistics, and study types, although most STARD items would still apply.

---

## DEVELOPMENT

This STARD list was released in 2015. The 30 items were identified by an international expert group of methodologists, researchers, and editors. The guiding principle in the development of STARD was to select items that, when reported, would help readers to judge the potential for bias in the study, to appraise the applicability of the study findings and the validity of conclusions and recommendations. The list represents an update of the first version, which was published in 2003.

More information can be found on <http://www.equator-network.org/reporting-guidelines/stard>.

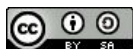

Supplement: bmjopen-2019-030421.draft_revisions.pdf [file bmjopen-2019-030421.draft_revisions.pdf]
